# Supplementary material for: Evaluation and Interpretation of Transcriptome Data Underlying Heterogeneous Chronic Obstructive Pulmonary Disease
Source: PubMed Central journal article supplement (PMC6459164; doi:10.5808/gi.2019.17.1.e2), 2019-03-31
Supplement: gi-2019-17-1-e2-suppl4.pdf [file gi-2019-17-1-e2-suppl4.pdf]

**Supplementary Table 1.** List of differentially expressed genes after deconvolution

| Gene     | log <sup>10</sup> (Adjus | log <sup>10</sup> (Adjus | Fold chang | Combined p-value |
|----------|--------------------------|--------------------------|------------|------------------|
| AATK     | 1.025189                 | 0.67593                  | -0.34926   | 5.44E-07         |
| ABTB1    | 1.246771                 | 0.878688                 | -0.36808   | 5.44E-07         |
| ACAP3    | 0.962667                 | 0.628372                 | -0.33429   | 5.44E-07         |
| ACP5     | 1.798233                 | 1.398043                 | -0.40019   | 5.44E-07         |
| ACTA2    | 1.644757                 | 1.27522                  | -0.36954   | 5.44E-07         |
| ACTB     | 2.674842                 | 2.213295                 | -0.46155   | 5.44E-07         |
| ACTG1    | 2.40878                  | 1.940589                 | -0.46819   | 5.44E-07         |
| ACTG2    | 1.053504                 | 0.728436                 | -0.32507   | 5.44E-07         |
| ADIRF    | 1.886374                 | 1.51171                  | -0.37466   | 5.44E-07         |
| ADRM1    | 1.314155                 | 0.955009                 | -0.35915   | 5.44E-07         |
| AES      | 1.878266                 | 1.502989                 | -0.37528   | 5.44E-07         |
| AGAP3    | 1.349862                 | 0.987894                 | -0.36197   | 5.44E-07         |
| AGER     | 2.248495                 | 1.789578                 | -0.45892   | 5.44E-07         |
| AGPAT2   | 1.432603                 | 1.081641                 | -0.35096   | 5.44E-07         |
| AGRN     | 1.45292                  | 1.122483                 | -0.33044   | 5.44E-07         |
| AGTRAP   | 1.21336                  | 0.832988                 | -0.38037   | 5.44E-07         |
| AHRR     | 1.293302                 | 0.912241                 | -0.38106   | 5.44E-07         |
| AK1      | 1.261802                 | 0.923499                 | -0.3383    | 5.44E-07         |
| ALDH16A1 | 1.00369                  | 0.615432                 | -0.38826   | 5.44E-07         |
| ALDOA    | 1.813553                 | 1.408374                 | -0.40518   | 5.44E-07         |
| ALKBH7   | 1.106729                 | 0.679356                 | -0.42737   | 5.44E-07         |
| ALS2CL   | 1.136595                 | 0.802961                 | -0.33363   | 5.44E-07         |
| ANAPC11  | 1.29217                  | 0.832797                 | -0.45937   | 5.44E-07         |
| ANKRD13  | 0.998196                 | 0.6615                   | -0.3367    | 5.44E-07         |
| APOC1    | 1.874408                 | 1.339411                 | -0.535     | 5.44E-07         |
| APOE     | 2.011775                 | 1.562746                 | -0.44903   | 5.44E-07         |
| APOLD1   | 0.715199                 | 1.052482                 | 0.337283   | 1.21E-05         |
| APRT     | 1.31802                  | 0.813547                 | -0.50447   | 5.44E-07         |
| ARF5     | 1.524256                 | 1.047593                 | -0.47666   | 5.44E-07         |
| ARFGAP1  | 1.261759                 | 0.885042                 | -0.37672   | 5.44E-07         |
| ARHGAP4  | 1.100262                 | 0.746083                 | -0.35418   | 5.44E-07         |
| ARHGDI1  | 1.72981                  | 1.365264                 | -0.36455   | 5.44E-07         |
| ARHGEF1  | 1.423074                 | 1.027049                 | -0.39603   | 5.44E-07         |
| ARL2     | 1.455761                 | 1.095063                 | -0.3607    | 5.44E-07         |
| ARL5B    | 0.481319                 | 0.956074                 | 0.474755   | 1.21E-05         |
| ARL6IP4  | 1.446668                 | 0.984932                 | -0.46174   | 5.44E-07         |
| ARPC1B   | 1.746557                 | 1.365892                 | -0.38066   | 5.44E-07         |
| ARRDC1   | 1.244966                 | 0.863305                 | -0.38166   | 5.44E-07         |
| ARVCF    | 0.721603                 | 0.383446                 | -0.33816   | 5.44E-07         |
| ASPSCR1  | 0.996615                 | 0.59934                  | -0.39728   | 5.44E-07         |
| ASXL2    | 0.491946                 | 0.880515                 | 0.388569   | 1.21E-05         |
| ATF4     | 1.786364                 | 1.417322                 | -0.36904   | 5.44E-07         |
| ATHL1    | 1.241405                 | 0.766706                 | -0.4747    | 5.44E-07         |
| ATOX1    | 1.541497                 | 1.131509                 | -0.40999   | 5.44E-07         |
| ATP5D    | 1.044489                 | 0.616955                 | -0.42753   | 5.44E-07         |
| ATP5G1   | 1.244824                 | 0.919918                 | -0.32491   | 5.44E-07         |
| ATP5G2   | 1.45232                  | 1.043308                 | -0.40901   | 5.44E-07         |
| ATP5I    | 1.90597                  | 1.372369                 | -0.5336    | 5.44E-07         |
| ATP5J    | 1.329185                 | 0.984063                 | -0.34512   | 5.44E-07         |
| ATP5J2   | 1.503528                 | 1.094774                 | -0.40875   | 5.44E-07         |
| ATP6V0B  | 1.476717                 | 1.093241                 | -0.38348   | 5.44E-07         |
| ATP6V0E1 | 1.900333                 | 1.543516                 | -0.35682   | 5.44E-07         |
| ATP6V1F  | 1.68005                  | 1.229399                 | -0.45065   | 5.44E-07         |

|                 |          |          |          |          |
|-----------------|----------|----------|----------|----------|
| <i>ATPIF1</i>   | 1.787123 | 1.35002  | -0.4371  | 5.44E-07 |
| <i>AUP1</i>     | 1.453357 | 1.108765 | -0.34459 | 5.44E-07 |
| <i>AURKAIP1</i> | 1.322177 | 0.816829 | -0.50535 | 5.44E-07 |
| <i>B2M</i>      | 3.290891 | 2.81391  | -0.47698 | 5.44E-07 |
| <i>B3GAT3</i>   | 0.698905 | 0.356532 | -0.34237 | 5.44E-07 |
| <i>BAD</i>      | 1.259242 | 0.809449 | -0.44979 | 5.44E-07 |
| <i>BAX</i>      | 1.350624 | 1.003032 | -0.34759 | 5.44E-07 |
| <i>BCAM</i>     | 1.620312 | 1.238408 | -0.3819  | 5.44E-07 |
| <i>BCL7C</i>    | 0.878573 | 0.509077 | -0.3695  | 5.44E-07 |
| <i>BLVRA</i>    | 1.459248 | 1.108979 | -0.35027 | 5.44E-07 |
| <i>BLVRB</i>    | 1.471844 | 1.042089 | -0.42975 | 5.44E-07 |
| <i>BOLA3</i>    | 1.052726 | 0.694619 | -0.35811 | 5.44E-07 |
| <i>BRAT1</i>    | 0.883134 | 0.515145 | -0.36799 | 5.44E-07 |
| <i>BRI3</i>     | 1.530004 | 1.179313 | -0.35069 | 5.44E-07 |
| <i>BSG</i>      | 1.824751 | 1.391891 | -0.43286 | 5.44E-07 |
| <i>BST2</i>     | 1.756083 | 1.294972 | -0.46111 | 5.44E-07 |
| <i>C11orf68</i> | 1.02833  | 0.680036 | -0.34829 | 5.44E-07 |
| <i>C12orf57</i> | 1.594911 | 1.253263 | -0.34165 | 5.44E-07 |
| <i>C16orf13</i> | 1.099544 | 0.675141 | -0.4244  | 5.44E-07 |
| <i>C19orf24</i> | 1.043516 | 0.71353  | -0.32999 | 5.44E-07 |
| <i>C19orf33</i> | 1.67258  | 1.229102 | -0.44348 | 5.44E-07 |
| <i>C19orf43</i> | 1.581974 | 1.157325 | -0.42465 | 5.44E-07 |
| <i>C19orf53</i> | 1.325612 | 0.974747 | -0.35086 | 5.44E-07 |
| <i>C19orf60</i> | 1.196735 | 0.705124 | -0.49161 | 5.44E-07 |
| <i>C19orf70</i> | 0.939434 | 0.503572 | -0.43586 | 5.44E-07 |
| <i>C1orf122</i> | 1.091437 | 0.711696 | -0.37974 | 5.44E-07 |
| <i>C1QA</i>     | 2.075674 | 1.542707 | -0.53297 | 5.44E-07 |
| <i>C1QB</i>     | 2.048    | 1.592525 | -0.45547 | 5.44E-07 |
| <i>C1QC</i>     | 1.934365 | 1.540512 | -0.39385 | 5.44E-07 |
| <i>C1QTNF5</i>  | 1.213278 | 0.835813 | -0.37746 | 5.44E-07 |
| <i>C21orf33</i> | 1.322748 | 0.981323 | -0.34143 | 5.44E-07 |
| <i>C2orf54</i>  | 0.870391 | 0.494083 | -0.37631 | 5.44E-07 |
| <i>C6orf1</i>   | 1.055359 | 0.657179 | -0.39818 | 5.44E-07 |
| <i>C6orf226</i> | 0.905211 | 0.483945 | -0.42127 | 5.44E-07 |
| <i>C7orf50</i>  | 1.232002 | 0.838345 | -0.39366 | 5.44E-07 |
| <i>C8orf82</i>  | 0.944386 | 0.594209 | -0.35018 | 5.44E-07 |
| <i>C9orf142</i> | 1.023591 | 0.531874 | -0.49172 | 5.44E-07 |
| <i>C9orf16</i>  | 1.202716 | 0.73692  | -0.4658  | 5.44E-07 |
| <i>CAMTA1</i>   | 1.317139 | 0.974127 | -0.34301 | 5.44E-07 |
| <i>CAPG</i>     | 1.671924 | 1.321401 | -0.35052 | 5.44E-07 |
| <i>CAPN15</i>   | 0.94106  | 0.611141 | -0.32992 | 5.44E-07 |
| <i>CAPNS1</i>   | 1.736063 | 1.400964 | -0.3351  | 5.44E-07 |
| <i>CAPS</i>     | 0.986914 | 0.63408  | -0.35283 | 5.44E-07 |
| <i>CARNMT1</i>  | 0.421772 | 0.773826 | 0.352054 | 1.21E-05 |
| <i>CBR1</i>     | 1.281867 | 0.928019 | -0.35385 | 5.44E-07 |
| <i>CCDC106</i>  | 0.641012 | 0.315254 | -0.32576 | 5.44E-07 |
| <i>CCDC12</i>   | 1.290033 | 0.866402 | -0.42363 | 5.44E-07 |
| <i>CCDC124</i>  | 1.350114 | 0.897982 | -0.45213 | 5.44E-07 |
| <i>CCDC130</i>  | 1.026553 | 0.646699 | -0.37985 | 5.44E-07 |
| <i>CCDC142</i>  | 1.302961 | 0.932529 | -0.37043 | 5.44E-07 |
| <i>CCDC88B</i>  | 0.962783 | 0.608432 | -0.35435 | 5.44E-07 |
| <i>CCS</i>      | 1.11463  | 0.775709 | -0.33892 | 5.44E-07 |
| <i>CD151</i>    | 1.803979 | 1.429331 | -0.37465 | 5.44E-07 |
| <i>CD37</i>     | 1.466708 | 1.1307   | -0.33601 | 5.44E-07 |
| <i>CD52</i>     | 2.244208 | 1.682509 | -0.5617  | 5.44E-07 |
| <i>CD63</i>     | 2.202573 | 1.825939 | -0.37663 | 5.44E-07 |

|                |          |          |          |          |
|----------------|----------|----------|----------|----------|
| <i>CD74</i>    | 2.669854 | 2.130565 | -0.53929 | 5.44E-07 |
| <i>CD81</i>    | 2.015438 | 1.624413 | -0.39102 | 5.44E-07 |
| <i>CDC34</i>   | 1.008697 | 0.648084 | -0.36061 | 5.44E-07 |
| <i>CDC37</i>   | 1.46011  | 1.089602 | -0.37051 | 5.44E-07 |
| <i>CDK10</i>   | 1.177747 | 0.804771 | -0.37298 | 5.44E-07 |
| <i>CDK5RAP</i> | 1.354116 | 0.993743 | -0.36037 | 5.44E-07 |
| <i>CDKL5</i>   | 0.133117 | 0.610964 | 0.477847 | 1.21E-05 |
| <i>CEMP1</i>   | 0.883828 | 0.521671 | -0.36216 | 5.44E-07 |
| <i>CFD</i>     | 1.735945 | 1.330732 | -0.40521 | 5.44E-07 |
| <i>CFL1</i>    | 2.002381 | 1.616841 | -0.38554 | 5.44E-07 |
| <i>CHCHD1</i>  | 1.122699 | 0.792612 | -0.33009 | 5.44E-07 |
| <i>CHCHD2</i>  | 1.309773 | 0.969946 | -0.33983 | 5.44E-07 |
| <i>CHMP1A</i>  | 1.242052 | 0.920097 | -0.32196 | 5.44E-07 |
| <i>CHMP2A</i>  | 1.608953 | 1.225687 | -0.38327 | 5.44E-07 |
| <i>CHPF</i>    | 1.142287 | 0.808331 | -0.33396 | 5.44E-07 |
| <i>CIB1</i>    | 1.61415  | 1.122227 | -0.49192 | 5.44E-07 |
| <i>CIRBP</i>   | 2.11962  | 1.768512 | -0.35111 | 5.44E-07 |
| <i>CKB</i>     | 1.370608 | 0.900407 | -0.4702  | 5.44E-07 |
| <i>CKS2</i>    | 1.221292 | 0.873673 | -0.34762 | 5.44E-07 |
| <i>CLASRP</i>  | 1.122079 | 0.785477 | -0.3366  | 5.44E-07 |
| <i>CLC</i>     | 0.260444 | 0.697204 | 0.43676  | 1.21E-05 |
| <i>CLDN3</i>   | 0.918627 | 0.583136 | -0.33549 | 5.44E-07 |
| <i>CLDN5</i>   | 1.457222 | 1.092379 | -0.36484 | 5.44E-07 |
| <i>CLEC3B</i>  | 1.73829  | 1.313361 | -0.42493 | 5.44E-07 |
| <i>CLIC3</i>   | 1.539609 | 1.021516 | -0.51809 | 5.44E-07 |
| <i>CLPP</i>    | 1.170163 | 0.810059 | -0.3601  | 5.44E-07 |
| <i>CLTA</i>    | 1.569514 | 1.18795  | -0.38156 | 5.44E-07 |
| <i>CLTB</i>    | 1.246654 | 0.895003 | -0.35165 | 5.44E-07 |
| <i>CNKSR1</i>  | 0.883202 | 0.519797 | -0.36341 | 5.44E-07 |
| <i>CNTN1</i>   | 0.379525 | 0.701529 | 0.322004 | 1.21E-05 |
| <i>COA3</i>    | 1.366982 | 0.864137 | -0.50284 | 5.44E-07 |
| <i>COL6A2</i>  | 1.6367   | 1.250477 | -0.38622 | 5.44E-07 |
| <i>COMMD4</i>  | 0.924913 | 0.588624 | -0.33629 | 5.44E-07 |
| <i>COMTD1</i>  | 0.789518 | 0.379702 | -0.40982 | 5.44E-07 |
| <i>COPE</i>    | 1.320467 | 0.890523 | -0.42994 | 5.44E-07 |
| <i>CORO7</i>   | 1.227767 | 0.842688 | -0.38508 | 5.44E-07 |
| <i>COX14</i>   | 1.434696 | 1.091908 | -0.34279 | 5.44E-07 |
| <i>COX17</i>   | 1.459812 | 0.929752 | -0.53006 | 5.44E-07 |
| <i>COX4I1</i>  | 1.909887 | 1.400971 | -0.50892 | 5.44E-07 |
| <i>COX4I2</i>  | 1.10175  | 0.648584 | -0.45317 | 5.44E-07 |
| <i>COX5B</i>   | 1.850159 | 1.465088 | -0.38507 | 5.44E-07 |
| <i>COX6A1</i>  | 1.30126  | 0.681573 | -0.61969 | 5.44E-07 |
| <i>COX6B1</i>  | 1.811232 | 1.379593 | -0.43164 | 5.44E-07 |
| <i>COX7C</i>   | 1.958279 | 1.61111  | -0.34717 | 5.44E-07 |
| <i>COX8A</i>   | 2.01169  | 1.432812 | -0.57888 | 5.44E-07 |
| <i>CPSF3L</i>  | 1.162198 | 0.7858   | -0.3764  | 5.44E-07 |
| <i>CPT1B</i>   | 1.277218 | 0.920474 | -0.35674 | 5.44E-07 |
| <i>CRACR2B</i> | 0.956461 | 0.542242 | -0.41422 | 5.44E-07 |
| <i>CRIP1</i>   | 1.771916 | 1.140417 | -0.6315  | 5.44E-07 |
| <i>CRIP2</i>   | 1.707718 | 1.163664 | -0.54405 | 5.44E-07 |
| <i>CROCC</i>   | 0.786144 | 0.462794 | -0.32335 | 5.44E-07 |
| <i>CSF3</i>    | 0.675195 | 1.031423 | 0.356228 | 4.27E-05 |
| <i>CST3</i>    | 2.109319 | 1.757023 | -0.3523  | 5.44E-07 |
| <i>CST6</i>    | 1.057598 | 0.676581 | -0.38102 | 5.44E-07 |
| <i>CTBP1</i>   | 1.415148 | 1.061736 | -0.35341 | 5.44E-07 |
| <i>CTDSP1</i>  | 1.423402 | 1.095342 | -0.32806 | 5.44E-07 |

|                |          |          |          |          |
|----------------|----------|----------|----------|----------|
| <i>CTSD</i>    | 2.363393 | 1.839887 | -0.52351 | 5.44E-07 |
| <i>CTSH</i>    | 2.067909 | 1.703289 | -0.36462 | 5.44E-07 |
| <i>CTSZ</i>    | 1.948819 | 1.566721 | -0.3821  | 5.44E-07 |
| <i>CUTA</i>    | 1.541681 | 1.16091  | -0.38077 | 5.44E-07 |
| <i>CXCL8</i>   | 1.12055  | 1.466515 | 0.345965 | 1.21E-05 |
| <i>CXCR1</i>   | 0.290708 | 0.628362 | 0.337654 | 1.21E-05 |
| <i>CXCR2</i>   | 0.318045 | 0.712489 | 0.394443 | 1.21E-05 |
| <i>CYBA</i>    | 1.958196 | 1.54425  | -0.41395 | 5.44E-07 |
| <i>CYHR1</i>   | 1.00683  | 0.644545 | -0.36229 | 5.44E-07 |
| <i>CYP1B1</i>  | 0.77636  | 1.174608 | 0.398248 | 1.21E-05 |
| <i>CYP27A1</i> | 1.509124 | 1.170996 | -0.33813 | 5.44E-07 |
| <i>CYP7B1</i>  | 0.28837  | 0.636186 | 0.347816 | 1.21E-05 |
| <i>CYSTM1</i>  | 1.590156 | 1.162713 | -0.42744 | 5.44E-07 |
| <i>D2HGDH</i>  | 1.002802 | 0.601542 | -0.40126 | 5.44E-07 |
| <i>DAD1</i>    | 1.852877 | 1.503156 | -0.34972 | 5.44E-07 |
| <i>DAPK3</i>   | 1.15639  | 0.831628 | -0.32476 | 5.44E-07 |
| <i>DBI</i>     | 1.899025 | 1.493809 | -0.40522 | 5.44E-07 |
| <i>DCTPP1</i>  | 1.006774 | 0.676341 | -0.33043 | 5.44E-07 |
| <i>DCUN1D3</i> | 0.603973 | 0.942263 | 0.33829  | 1.21E-05 |
| <i>DCXR</i>    | 1.325208 | 0.921303 | -0.4039  | 5.44E-07 |
| <i>DDAH2</i>   | 1.41655  | 1.074538 | -0.34201 | 5.44E-07 |
| <i>DDR2</i>    | 0.446229 | 0.881113 | 0.434884 | 1.21E-05 |
| <i>DDRKG1</i>  | 1.31147  | 0.978108 | -0.33336 | 5.44E-07 |
| <i>DEFB1</i>   | 0.516358 | 0.981855 | 0.465497 | 1.21E-05 |
| <i>DES</i>     | 1.214838 | 0.832243 | -0.38259 | 5.44E-07 |
| <i>DGCR6</i>   | 0.883927 | 0.549105 | -0.33482 | 5.44E-07 |
| <i>DGCR6L</i>  | 1.039664 | 0.683707 | -0.35596 | 5.44E-07 |
| <i>DGUOK</i>   | 1.194714 | 0.866017 | -0.3287  | 5.44E-07 |
| <i>DMPK</i>    | 1.182677 | 0.798299 | -0.38438 | 5.44E-07 |
| <i>DNAJC4</i>  | 1.045504 | 0.695828 | -0.34968 | 5.44E-07 |
| <i>DNPH1</i>   | 1.157555 | 0.785314 | -0.37224 | 5.44E-07 |
| <i>DOCK5</i>   | 0.505418 | 0.837302 | 0.331884 | 1.21E-05 |
| <i>DOHH</i>    | 0.758982 | 0.428616 | -0.33037 | 5.44E-07 |
| <i>DOK2</i>    | 1.26563  | 0.878962 | -0.38667 | 5.44E-07 |
| <i>DPM2</i>    | 0.996713 | 0.664645 | -0.33207 | 5.44E-07 |
| <i>DPM3</i>    | 1.444828 | 0.956847 | -0.48798 | 5.44E-07 |
| <i>DPP7</i>    | 1.429937 | 1.032561 | -0.39738 | 5.44E-07 |
| <i>DPP8</i>    | 0.596943 | 0.96085  | 0.363907 | 1.21E-05 |
| <i>DRAP1</i>   | 1.405672 | 0.997929 | -0.40774 | 5.44E-07 |
| <i>DUS1L</i>   | 1.122876 | 0.788978 | -0.3339  | 5.44E-07 |
| <i>DUSP23</i>  | 1.200799 | 0.720798 | -0.48    | 5.44E-07 |
| <i>DVL1</i>    | 1.108556 | 0.722594 | -0.38596 | 5.44E-07 |
| <i>DYNLL1</i>  | 1.670494 | 1.180664 | -0.48983 | 5.44E-07 |
| <i>E4F1</i>    | 0.826298 | 0.498572 | -0.32773 | 5.44E-07 |
| <i>ECH1</i>    | 1.610394 | 1.230668 | -0.37973 | 5.44E-07 |
| <i>ECHDC2</i>  | 1.170409 | 0.758858 | -0.41155 | 5.44E-07 |
| <i>ECI1</i>    | 1.049146 | 0.683702 | -0.36544 | 5.44E-07 |
| <i>EDARADD</i> | 1.210408 | 0.823621 | -0.38679 | 5.44E-07 |
| <i>EDF1</i>    | 1.885263 | 1.407287 | -0.47798 | 5.44E-07 |
| <i>EEF1D</i>   | 1.489866 | 0.922045 | -0.56782 | 5.44E-07 |
| <i>EEF1G</i>   | 1.285723 | 0.925015 | -0.36071 | 5.44E-07 |
| <i>EEF2</i>    | 2.110056 | 1.763606 | -0.34645 | 5.44E-07 |
| <i>EFNA1</i>   | 1.430242 | 1.071522 | -0.35872 | 5.44E-07 |
| <i>EGFL7</i>   | 1.407348 | 0.922964 | -0.48438 | 5.44E-07 |
| <i>EGFR</i>    | 0.724307 | 1.059416 | 0.335108 | 1.21E-05 |
| <i>EIF2AK2</i> | 0.542013 | 0.981881 | 0.439867 | 1.21E-05 |

|                 |          |          |          |          |
|-----------------|----------|----------|----------|----------|
| <i>EIF3G</i>    | 1.635581 | 1.26988  | -0.3657  | 5.44E-07 |
| <i>EIF3K</i>    | 1.524073 | 1.113882 | -0.41019 | 5.44E-07 |
| <i>EIF4EBP1</i> | 1.053806 | 0.678746 | -0.37506 | 5.44E-07 |
| <i>EIF6</i>     | 1.41156  | 1.081393 | -0.33017 | 5.44E-07 |
| <i>ELMO3</i>    | 0.758329 | 0.435817 | -0.32251 | 5.44E-07 |
| <i>EMP3</i>     | 1.415424 | 0.989631 | -0.42579 | 5.44E-07 |
| <i>ENKD1</i>    | 0.860601 | 0.489634 | -0.37097 | 5.44E-07 |
| <i>ENTHD2</i>   | 0.879072 | 0.495284 | -0.38379 | 5.44E-07 |
| <i>ENTPD5</i>   | 0.448965 | 0.779293 | 0.330328 | 1.21E-05 |
| <i>EPN1</i>     | 1.315634 | 0.95035  | -0.36528 | 5.44E-07 |
| <i>EPOR</i>     | 0.913672 | 0.571311 | -0.34236 | 5.44E-07 |
| <i>EPS8L1</i>   | 0.883301 | 0.546072 | -0.33723 | 5.44E-07 |
| <i>EPS8L2</i>   | 1.399905 | 0.965752 | -0.43415 | 5.44E-07 |
| <i>EREG</i>     | 0.352129 | 0.727597 | 0.375468 | 1.21E-05 |
| <i>ERH</i>      | 1.586884 | 1.255503 | -0.33138 | 5.44E-07 |
| <i>ERN1</i>     | 0.569674 | 0.925425 | 0.35575  | 1.21E-05 |
| <i>ERP29</i>    | 1.504699 | 1.16143  | -0.34327 | 5.44E-07 |
| <i>ETFB</i>     | 1.392047 | 0.889283 | -0.50276 | 5.44E-07 |
| <i>EVA1B</i>    | 1.026237 | 0.62954  | -0.3967  | 5.44E-07 |
| <i>EVPL</i>     | 0.996909 | 0.627353 | -0.36956 | 5.44E-07 |
| <i>EXD3</i>     | 0.856378 | 0.533093 | -0.32328 | 5.44E-07 |
| <i>EXOC6B</i>   | 0.467427 | 0.855358 | 0.387931 | 1.21E-05 |
| <i>EXOSC4</i>   | 0.939749 | 0.591199 | -0.34855 | 5.44E-07 |
| <i>FABP4</i>    | 1.834941 | 1.486143 | -0.3488  | 5.44E-07 |
| <i>FADS3</i>    | 1.137198 | 0.763246 | -0.37395 | 5.44E-07 |
| <i>FAM110A</i>  | 0.951864 | 0.609323 | -0.34254 | 5.44E-07 |
| <i>FAM127A</i>  | 1.519663 | 1.124773 | -0.39489 | 5.44E-07 |
| <i>FAM127B</i>  | 1.259186 | 0.779961 | -0.47922 | 5.44E-07 |
| <i>FAM129B</i>  | 1.56234  | 1.205918 | -0.35642 | 5.44E-07 |
| <i>FAM193B</i>  | 1.139827 | 0.742719 | -0.39711 | 5.44E-07 |
| <i>FAM195B</i>  | 1.26956  | 0.880914 | -0.38865 | 5.44E-07 |
| <i>FAM3A</i>    | 1.054149 | 0.661658 | -0.39249 | 5.44E-07 |
| <i>FAM50A</i>   | 1.292895 | 0.928139 | -0.36476 | 5.44E-07 |
| <i>FAM63B</i>   | 0.308993 | 0.667436 | 0.358444 | 1.21E-05 |
| <i>FAM96B</i>   | 1.375665 | 0.949526 | -0.42614 | 5.44E-07 |
| <i>FASTK</i>    | 1.124789 | 0.684716 | -0.44007 | 5.44E-07 |
| <i>FAU</i>      | 1.808328 | 1.276718 | -0.53161 | 5.44E-07 |
| <i>FBL</i>      | 1.438991 | 1.025079 | -0.41391 | 5.44E-07 |
| <i>FBP1</i>     | 1.711391 | 1.321593 | -0.3898  | 5.44E-07 |
| <i>FBXL15</i>   | 0.737084 | 0.408002 | -0.32908 | 5.44E-07 |
| <i>FBXW5</i>    | 1.318725 | 0.932035 | -0.38669 | 5.44E-07 |
| <i>FCGRT</i>    | 1.646791 | 1.249006 | -0.39778 | 5.44E-07 |
| <i>FDX1L</i>    | 0.863813 | 0.475754 | -0.38806 | 5.44E-07 |
| <i>FGA</i>      | 0.177779 | 0.555975 | 0.378196 | 1.21E-05 |
| <i>FGF7</i>     | 0.56864  | 0.951539 | 0.382899 | 1.21E-05 |
| <i>FGG</i>      | 0.674339 | 1.265561 | 0.591222 | 1.21E-05 |
| <i>FHOD1</i>    | 1.224942 | 0.884632 | -0.34031 | 5.44E-07 |
| <i>FIS1</i>     | 1.578546 | 1.172072 | -0.40647 | 5.44E-07 |
| <i>FKBP2</i>    | 1.39361  | 0.901359 | -0.49225 | 5.44E-07 |
| <i>FKBP8</i>    | 1.49508  | 1.014338 | -0.48074 | 5.44E-07 |
| <i>FLYWCH2</i>  | 0.972942 | 0.634712 | -0.33823 | 5.44E-07 |
| <i>FOLR1</i>    | 1.622377 | 1.289375 | -0.333   | 5.44E-07 |
| <i>FTL</i>      | 2.840933 | 2.185637 | -0.6553  | 5.44E-07 |
| <i>FUOM</i>     | 0.992421 | 0.548741 | -0.44368 | 5.44E-07 |
| <i>FXYD5</i>    | 1.558157 | 1.21424  | -0.34392 | 5.44E-07 |
| <i>GABARAP</i>  | 1.879582 | 1.459558 | -0.42002 | 5.44E-07 |

|                 |          |          |          |          |
|-----------------|----------|----------|----------|----------|
| <i>GADD45G</i>  | 0.950128 | 0.600417 | -0.34971 | 5.44E-07 |
| <i>GADD45G</i>  | 1.156777 | 0.762025 | -0.39475 | 5.44E-07 |
| <i>GALNT5</i>   | 0.602513 | 0.929738 | 0.327225 | 1.21E-05 |
| <i>GAPDH</i>    | 1.713805 | 1.365893 | -0.34791 | 5.44E-07 |
| <i>GAS6</i>     | 1.63103  | 1.203945 | -0.42709 | 5.44E-07 |
| <i>GCHFR</i>    | 1.296759 | 0.96258  | -0.33418 | 5.44E-07 |
| <i>GDPD3</i>    | 0.710183 | 0.379455 | -0.33073 | 5.44E-07 |
| <i>GIPC1</i>    | 1.325278 | 0.958119 | -0.36716 | 5.44E-07 |
| <i>GMFG</i>     | 1.679327 | 1.33702  | -0.34231 | 5.44E-07 |
| <i>GNB2</i>     | 1.544026 | 1.116575 | -0.42745 | 5.44E-07 |
| <i>GNB2L1</i>   | 2.183623 | 1.722484 | -0.46114 | 5.44E-07 |
| <i>GNG11</i>    | 1.729968 | 1.317407 | -0.41256 | 5.44E-07 |
| <i>GNG5</i>     | 1.501163 | 1.055483 | -0.44568 | 5.44E-07 |
| <i>GNLY</i>     | 1.097536 | 0.751381 | -0.34615 | 5.44E-07 |
| <i>GPR15</i>    | 0.196837 | 0.609904 | 0.413067 | 1.21E-05 |
| <i>GPRIN3</i>   | 0.369489 | 0.695414 | 0.325925 | 1.21E-05 |
| <i>GPS1</i>     | 1.17997  | 0.828543 | -0.35143 | 5.44E-07 |
| <i>GPSM1</i>    | 0.975066 | 0.59226  | -0.38281 | 5.44E-07 |
| <i>GPX1</i>     | 1.698507 | 1.149835 | -0.54867 | 5.44E-07 |
| <i>GPX4</i>     | 1.766243 | 1.326319 | -0.43992 | 5.44E-07 |
| <i>GRN</i>      | 2.005509 | 1.575456 | -0.43005 | 5.44E-07 |
| <i>GSDMD</i>    | 1.292635 | 0.879506 | -0.41313 | 5.44E-07 |
| <i>GSN</i>      | 1.882653 | 1.544254 | -0.3384  | 5.44E-07 |
| <i>GSTP1</i>    | 1.994923 | 1.496165 | -0.49876 | 5.44E-07 |
| <i>GTF2I</i>    | 1.01526  | 1.394101 | 0.378842 | 1.21E-05 |
| <i>GTF3C3</i>   | 0.73395  | 1.059447 | 0.325497 | 1.21E-05 |
| <i>GUK1</i>     | 1.647264 | 1.307903 | -0.33936 | 5.44E-07 |
| <i>GYPE</i>     | 1.396259 | 1.051567 | -0.34469 | 5.44E-07 |
| <i>HACD2</i>    | 0.821565 | 1.270309 | 0.448744 | 1.21E-05 |
| <i>HAS2</i>     | 0.601761 | 1.004055 | 0.402295 | 1.21E-05 |
| <i>HAUS7</i>    | 0.865877 | 0.522462 | -0.34341 | 5.44E-07 |
| <i>HBA2</i>     | 0.935842 | 0.521387 | -0.41445 | 5.44E-07 |
| <i>HCFR1R1</i>  | 1.280726 | 0.896577 | -0.38415 | 5.44E-07 |
| <i>HCST</i>     | 1.416683 | 0.984255 | -0.43243 | 5.44E-07 |
| <i>HDAC10</i>   | 0.78697  | 0.432312 | -0.35466 | 5.44E-07 |
| <i>HEXDC</i>    | 0.947426 | 0.569987 | -0.37744 | 5.44E-07 |
| <i>HIGD1B</i>   | 1.220643 | 0.732466 | -0.48818 | 5.44E-07 |
| <i>HIGD2A</i>   | 1.474239 | 1.009984 | -0.46425 | 5.44E-07 |
| <i>HINT1</i>    | 1.807688 | 1.467504 | -0.34018 | 5.44E-07 |
| <i>HINT2</i>    | 1.147381 | 0.76598  | -0.3814  | 5.44E-07 |
| <i>HLA-A</i>    | 2.051321 | 1.581603 | -0.46972 | 5.44E-07 |
| <i>HLA-B</i>    | 2.37656  | 1.891062 | -0.4855  | 5.44E-07 |
| <i>HLA-C</i>    | 2.234197 | 1.868582 | -0.36561 | 5.44E-07 |
| <i>HLA-DMA</i>  | 1.845496 | 1.518876 | -0.32662 | 5.44E-07 |
| <i>HLA-DRA</i>  | 2.603524 | 2.278139 | -0.32538 | 5.44E-07 |
| <i>HLA-DRB1</i> | 2.177798 | 1.686846 | -0.49095 | 5.44E-07 |
| <i>HLA-DRB5</i> | 1.643108 | 1.232698 | -0.41041 | 5.44E-07 |
| <i>HLA-F</i>    | 1.612025 | 1.260023 | -0.352   | 5.44E-07 |
| <i>HMBOX1</i>   | 0.323247 | 0.864832 | 0.541585 | 1.21E-05 |
| <i>HMG20B</i>   | 1.276802 | 0.94175  | -0.33505 | 5.44E-07 |
| <i>HMHA1</i>    | 1.165191 | 0.814918 | -0.35027 | 5.44E-07 |
| <i>HOOK2</i>    | 1.024218 | 0.687664 | -0.33655 | 5.44E-07 |
| <i>HPN</i>      | 0.872859 | 0.526787 | -0.34607 | 5.44E-07 |
| <i>HRAS</i>     | 1.035316 | 0.544789 | -0.49053 | 5.44E-07 |
| <i>HSPB1</i>    | 1.91551  | 1.35801  | -0.5575  | 5.44E-07 |
| <i>HSPBP1</i>   | 0.907899 | 0.564126 | -0.34377 | 5.44E-07 |

|                |          |          |          |          |
|----------------|----------|----------|----------|----------|
| <i>ICAM5</i>   | 0.943668 | 0.60589  | -0.33778 | 5.44E-07 |
| <i>ID1</i>     | 1.76399  | 1.37051  | -0.39348 | 5.44E-07 |
| <i>IDH3G</i>   | 1.156673 | 0.78608  | -0.37059 | 5.44E-07 |
| <i>IFI27</i>   | 2.105347 | 1.613378 | -0.49197 | 5.44E-07 |
| <i>IFI27L2</i> | 1.573999 | 1.032188 | -0.54181 | 5.44E-07 |
| <i>IFI30</i>   | 2.205636 | 1.773781 | -0.43185 | 5.44E-07 |
| <i>IFI6</i>    | 1.836293 | 1.34956  | -0.48673 | 5.44E-07 |
| <i>IFITM2</i>  | 1.740385 | 1.347212 | -0.39317 | 5.44E-07 |
| <i>IFITM3</i>  | 2.113201 | 1.627516 | -0.48569 | 5.44E-07 |
| <i>IFT43</i>   | 1.260805 | 0.8208   | -0.44001 | 5.44E-07 |
| <i>IGSF8</i>   | 1.037954 | 0.71472  | -0.32323 | 5.44E-07 |
| <i>IL11RA</i>  | 0.932921 | 0.600789 | -0.33213 | 5.44E-07 |
| <i>IL6</i>     | 1.225023 | 1.606523 | 0.3815   | 1.21E-05 |
| <i>IMP3</i>    | 1.298431 | 0.957815 | -0.34062 | 5.44E-07 |
| <i>INF2</i>    | 1.265967 | 0.938298 | -0.32767 | 5.44E-07 |
| <i>INHBA</i>   | 0.735511 | 1.107369 | 0.371859 | 1.21E-05 |
| <i>IRF3</i>    | 1.204728 | 0.798289 | -0.40644 | 5.44E-07 |
| <i>IRF7</i>    | 0.937445 | 0.586125 | -0.35132 | 5.44E-07 |
| <i>ISG15</i>   | 1.385659 | 0.929047 | -0.45661 | 5.44E-07 |
| <i>ISOC2</i>   | 1.005876 | 0.661152 | -0.34472 | 5.44E-07 |
| <i>ITPA</i>    | 1.179242 | 0.827027 | -0.35221 | 5.44E-07 |
| <i>JMJD8</i>   | 1.183016 | 0.827957 | -0.35506 | 5.44E-07 |
| <i>JOSD2</i>   | 0.989326 | 0.565567 | -0.42376 | 5.44E-07 |
| <i>JTB</i>     | 1.414666 | 1.059867 | -0.3548  | 5.44E-07 |
| <i>KANK3</i>   | 1.034726 | 0.700705 | -0.33402 | 5.44E-07 |
| <i>KAT2A</i>   | 1.116524 | 0.791271 | -0.32525 | 5.44E-07 |
| <i>KIFC2</i>   | 0.957982 | 0.540853 | -0.41713 | 5.44E-07 |
| <i>KIFC3</i>   | 1.172277 | 0.793599 | -0.37868 | 5.44E-07 |
| <i>KPNA5</i>   | 0.392058 | 0.715928 | 0.32387  | 1.21E-05 |
| <i>KRT18</i>   | 1.606263 | 1.278817 | -0.32745 | 5.44E-07 |
| <i>KRT19</i>   | 1.689622 | 1.262068 | -0.42755 | 5.44E-07 |
| <i>KRTCAP2</i> | 1.553693 | 1.031447 | -0.52225 | 5.44E-07 |
| <i>KRTCAP3</i> | 0.944302 | 0.609145 | -0.33516 | 5.44E-07 |
| <i>LAGE3</i>   | 0.889276 | 0.433092 | -0.45618 | 5.44E-07 |
| <i>LAMTOR4</i> | 1.615459 | 1.191888 | -0.42357 | 5.44E-07 |
| <i>LAMTOR5</i> | 1.514443 | 1.081666 | -0.43278 | 5.44E-07 |
| <i>LAT</i>     | 0.919798 | 0.548181 | -0.37162 | 5.44E-07 |
| <i>LGALS1</i>  | 2.257071 | 1.677852 | -0.57922 | 5.44E-07 |
| <i>LGALS3B</i> | 1.868657 | 1.464529 | -0.40413 | 5.44E-07 |
| <i>LIMS2</i>   | 1.353931 | 0.999266 | -0.35466 | 5.44E-07 |
| <i>LLGL2</i>   | 1.217162 | 0.855306 | -0.36186 | 5.44E-07 |
| <i>LMBRD2</i>  | 0.283195 | 0.64065  | 0.357454 | 1.21E-05 |
| <i>LMF2</i>    | 1.224592 | 0.860218 | -0.36437 | 5.44E-07 |
| <i>LNPEP</i>   | 0.286208 | 0.694722 | 0.408514 | 1.21E-05 |
| <i>LRFN4</i>   | 0.697171 | 0.370298 | -0.32687 | 5.44E-07 |
| <i>LRRC75B</i> | 0.617565 | 0.26543  | -0.35213 | 5.44E-07 |
| <i>LSM3</i>    | 1.265558 | 0.926484 | -0.33907 | 5.44E-07 |
| <i>LSM7</i>    | 1.41217  | 0.877969 | -0.5342  | 5.44E-07 |
| <i>LSR</i>     | 1.243652 | 0.907155 | -0.3365  | 5.44E-07 |
| <i>LTBP3</i>   | 1.421185 | 1.061153 | -0.36003 | 5.44E-07 |
| <i>LTBP4</i>   | 1.67257  | 1.334006 | -0.33856 | 5.44E-07 |
| <i>LUC7L</i>   | 1.234278 | 0.840639 | -0.39364 | 5.44E-07 |
| <i>LY6E</i>    | 1.835047 | 1.429611 | -0.40544 | 5.44E-07 |
| <i>LYPLA2</i>  | 0.916554 | 0.577065 | -0.33949 | 5.44E-07 |
| <i>LZTS2</i>   | 1.089139 | 0.703057 | -0.38608 | 5.44E-07 |
| <i>MACROD1</i> | 0.901737 | 0.565189 | -0.33655 | 5.44E-07 |

|                 |          |          |          |          |
|-----------------|----------|----------|----------|----------|
| <i>MALSU1</i>   | 1.10393  | 0.769152 | -0.33478 | 5.44E-07 |
| <i>MAN1A2</i>   | 0.53857  | 0.892406 | 0.353836 | 1.21E-05 |
| <i>MAP1LC3</i>  | 1.14014  | 0.816465 | -0.32367 | 5.44E-07 |
| <i>MAP7D1</i>   | 1.305064 | 0.980922 | -0.32414 | 5.44E-07 |
| <i>MAPK15</i>   | 0.785509 | 0.432915 | -0.35259 | 5.44E-07 |
| <i>MAPK3</i>    | 1.234314 | 0.8652   | -0.36911 | 5.44E-07 |
| <i>MAPK8IP3</i> | 1.032144 | 0.700691 | -0.33145 | 5.44E-07 |
| <i>MARCO</i>    | 1.713341 | 1.373037 | -0.3403  | 5.44E-07 |
| <i>MBD3</i>     | 1.194604 | 0.773594 | -0.42101 | 5.44E-07 |
| <i>MDK</i>      | 1.179405 | 0.806018 | -0.37339 | 5.44E-07 |
| <i>MDP1</i>     | 1.545144 | 1.126777 | -0.41837 | 5.44E-07 |
| <i>MEA1</i>     | 1.190133 | 0.841434 | -0.3487  | 5.44E-07 |
| <i>MFSD10</i>   | 1.33757  | 0.92153  | -0.41604 | 5.44E-07 |
| <i>MGAT4B</i>   | 1.261464 | 0.937537 | -0.32393 | 5.44E-07 |
| <i>MIA</i>      | 1.562409 | 1.144894 | -0.41752 | 5.44E-07 |
| <i>MIB2</i>     | 0.8755   | 0.48901  | -0.38649 | 5.44E-07 |
| <i>MIEN1</i>    | 1.226994 | 0.855432 | -0.37156 | 5.44E-07 |
| <i>MIF</i>      | 1.881353 | 1.291278 | -0.59008 | 5.44E-07 |
| <i>MIIP</i>     | 0.952312 | 0.584555 | -0.36776 | 5.44E-07 |
| <i>MINOS1</i>   | 1.696823 | 1.356134 | -0.34069 | 5.44E-07 |
| <i>MLST8</i>    | 0.919843 | 0.591524 | -0.32832 | 5.44E-07 |
| <i>MMRN1</i>    | 0.664502 | 1.083491 | 0.418988 | 1.21E-05 |
| <i>MOB2</i>     | 1.052041 | 0.690468 | -0.36157 | 5.44E-07 |
| <i>MOSPD3</i>   | 0.928508 | 0.575707 | -0.3528  | 5.44E-07 |
| <i>MPG</i>      | 1.197619 | 0.788835 | -0.40878 | 5.44E-07 |
| <i>MPLKIP</i>   | 1.108525 | 0.768997 | -0.33953 | 5.44E-07 |
| <i>MPST</i>     | 1.243915 | 0.893907 | -0.35001 | 5.44E-07 |
| <i>MRPL12</i>   | 1.060821 | 0.698817 | -0.362   | 5.44E-07 |
| <i>MRPL14</i>   | 1.484898 | 1.00298  | -0.48192 | 5.44E-07 |
| <i>MRPL20</i>   | 1.583778 | 1.208799 | -0.37498 | 5.44E-07 |
| <i>MRPL21</i>   | 1.176832 | 0.803673 | -0.37316 | 5.44E-07 |
| <i>MRPL23</i>   | 1.322675 | 0.870862 | -0.45181 | 5.44E-07 |
| <i>MRPL27</i>   | 1.298199 | 0.910811 | -0.38739 | 5.44E-07 |
| <i>MRPL28</i>   | 1.149865 | 0.803124 | -0.34674 | 5.44E-07 |
| <i>MRPL38</i>   | 1.024559 | 0.663344 | -0.36122 | 5.44E-07 |
| <i>MRPL4</i>    | 1.031044 | 0.616407 | -0.41464 | 5.44E-07 |
| <i>MRPL41</i>   | 1.406619 | 0.810615 | -0.596   | 5.44E-07 |
| <i>MRPL51</i>   | 1.599581 | 1.252784 | -0.3468  | 5.44E-07 |
| <i>MRPL54</i>   | 1.288356 | 0.940592 | -0.34776 | 5.44E-07 |
| <i>MRPL55</i>   | 1.024464 | 0.575148 | -0.44932 | 5.44E-07 |
| <i>MRPS12</i>   | 0.888739 | 0.548708 | -0.34003 | 5.44E-07 |
| <i>MRPS2</i>    | 0.998368 | 0.664041 | -0.33433 | 5.44E-07 |
| <i>MRPS26</i>   | 1.004416 | 0.633524 | -0.37089 | 5.44E-07 |
| <i>MRPS34</i>   | 1.20684  | 0.766727 | -0.44011 | 5.44E-07 |
| <i>MS4A15</i>   | 1.152305 | 0.809028 | -0.34328 | 5.44E-07 |
| <i>MS4A6E</i>   | 0.954689 | 0.540574 | -0.41412 | 5.44E-07 |
| <i>MSLN</i>     | 1.387114 | 0.988087 | -0.39903 | 5.44E-07 |
| <i>MUC1</i>     | 1.898011 | 1.542695 | -0.35532 | 5.44E-07 |
| <i>MVD</i>      | 1.088012 | 0.710657 | -0.37736 | 5.44E-07 |
| <i>MVP</i>      | 1.512945 | 1.184766 | -0.32818 | 5.44E-07 |
| <i>MYDGF</i>    | 1.535285 | 1.213075 | -0.32221 | 5.44E-07 |
| <i>MYEOV2</i>   | 1.610845 | 1.202209 | -0.40864 | 5.44E-07 |
| <i>MYL6</i>     | 2.267636 | 1.730656 | -0.53698 | 5.44E-07 |
| <i>MYL9</i>     | 1.821528 | 1.451419 | -0.37011 | 5.44E-07 |
| <i>MYO9A</i>    | 0.318143 | 0.690448 | 0.372306 | 1.21E-05 |
| <i>MZT2A</i>    | 1.170915 | 0.761418 | -0.4095  | 5.44E-07 |



|                |          |          |          |          |
|----------------|----------|----------|----------|----------|
| <i>MZT2B</i>   | 1.058062 | 0.67633  | -0.38173 | 5.44E-07 |
| <i>NAA10</i>   | 1.113455 | 0.731766 | -0.38169 | 5.44E-07 |
| <i>NACA</i>    | 1.713573 | 1.30992  | -0.40365 | 5.44E-07 |
| <i>NAT14</i>   | 0.843866 | 0.480436 | -0.36343 | 5.44E-07 |
| <i>NAT9</i>    | 1.006482 | 0.663643 | -0.34284 | 5.44E-07 |
| <i>NCLN</i>    | 1.041417 | 0.707775 | -0.33364 | 5.44E-07 |
| <i>NCOA2</i>   | 0.478903 | 0.825648 | 0.346745 | 1.21E-05 |
| <i>NCOA7</i>   | 1.229627 | 1.556277 | 0.32665  | 1.21E-05 |
| <i>NDUFA11</i> | 1.489914 | 1.091278 | -0.39864 | 5.44E-07 |
| <i>NDUFA13</i> | 1.786166 | 1.287294 | -0.49887 | 5.44E-07 |
| <i>NDUFA2</i>  | 1.509755 | 1.161306 | -0.34845 | 5.44E-07 |
| <i>NDUFA4</i>  | 1.005728 | 0.63135  | -0.37438 | 5.44E-07 |
| <i>NDUFA7</i>  | 1.266945 | 0.793617 | -0.47333 | 5.44E-07 |
| <i>NDUFAB1</i> | 1.514604 | 1.094647 | -0.41996 | 5.44E-07 |
| <i>NDUFAF3</i> | 1.260826 | 0.909112 | -0.35171 | 5.44E-07 |
| <i>NDUFB10</i> | 1.379099 | 0.973237 | -0.40586 | 5.44E-07 |
| <i>NDUFB11</i> | 1.274036 | 0.930028 | -0.34401 | 5.44E-07 |
| <i>NDUFB2</i>  | 1.797189 | 1.327681 | -0.46951 | 5.44E-07 |
| <i>NDUFB7</i>  | 1.612452 | 1.085363 | -0.52709 | 5.44E-07 |
| <i>NDUFS3</i>  | 1.297321 | 0.917128 | -0.38019 | 5.44E-07 |
| <i>NDUFS5</i>  | 1.876765 | 1.434934 | -0.44183 | 5.44E-07 |
| <i>NDUFS6</i>  | 1.515156 | 1.12269  | -0.39247 | 5.44E-07 |
| <i>NDUFS7</i>  | 1.391531 | 0.953741 | -0.43779 | 5.44E-07 |
| <i>NDUFS8</i>  | 1.229227 | 0.838702 | -0.39053 | 5.44E-07 |
| <i>NDUFV1</i>  | 1.367274 | 0.980804 | -0.38647 | 5.44E-07 |
| <i>NDUFV2</i>  | 0.925139 | 0.593036 | -0.3321  | 5.44E-07 |
| <i>NELFA</i>   | 1.081879 | 0.680343 | -0.40154 | 5.44E-07 |
| <i>NELFB</i>   | 1.053381 | 0.727627 | -0.32575 | 5.44E-07 |
| <i>NFKBIL1</i> | 0.840247 | 0.516677 | -0.32357 | 5.44E-07 |
| <i>NHLRC2</i>  | 0.35632  | 0.69199  | 0.33567  | 1.21E-05 |
| <i>NHP2</i>    | 1.034384 | 0.653681 | -0.3807  | 5.44E-07 |
| <i>NHSL2</i>   | 0.201664 | 0.570745 | 0.36908  | 1.21E-05 |
| <i>NME1</i>    | 1.690121 | 1.247682 | -0.44244 | 5.44E-07 |
| <i>NME3</i>    | 1.206693 | 0.65188  | -0.55481 | 5.44E-07 |
| <i>NMRAL1</i>  | 0.998077 | 0.65327  | -0.34481 | 5.44E-07 |
| <i>NOL3</i>    | 0.965358 | 0.5957   | -0.36966 | 5.44E-07 |
| <i>NOP10</i>   | 1.719264 | 1.339664 | -0.3796  | 5.44E-07 |
| <i>NOSIP</i>   | 1.108918 | 0.768295 | -0.34062 | 5.44E-07 |
| <i>NPC2</i>    | 2.247446 | 1.899708 | -0.34774 | 5.44E-07 |
| <i>NPDC1</i>   | 1.157757 | 0.799359 | -0.3584  | 5.44E-07 |
| <i>NR1H2</i>   | 1.326644 | 1.003612 | -0.32303 | 5.44E-07 |
| <i>NR4A3</i>   | 0.916292 | 1.354153 | 0.437861 | 1.21E-05 |
| <i>NT5C</i>    | 1.018108 | 0.639967 | -0.37814 | 5.44E-07 |
| <i>NTHL1</i>   | 0.812691 | 0.453888 | -0.3588  | 5.44E-07 |
| <i>NTRK2</i>   | 0.27481  | 0.5997   | 0.32489  | 1.21E-05 |
| <i>NUBP2</i>   | 1.092488 | 0.667013 | -0.42547 | 5.44E-07 |
| <i>NUCB1</i>   | 1.660437 | 1.331339 | -0.3291  | 5.44E-07 |
| <i>NUDT22</i>  | 0.969208 | 0.625209 | -0.344   | 5.44E-07 |
| <i>NUPR1</i>   | 1.717411 | 1.283072 | -0.43434 | 5.44E-07 |
| <i>OAZ1</i>    | 2.105673 | 1.626196 | -0.47948 | 5.44E-07 |
| <i>OBSL1</i>   | 1.124886 | 0.781497 | -0.34339 | 5.44E-07 |
| <i>OCLM</i>    | 0.144163 | 0.476549 | 0.332385 | 1.21E-05 |
| <i>ODF3B</i>   | 1.207893 | 0.766647 | -0.44125 | 5.44E-07 |
| <i>OGFR</i>    | 1.090092 | 0.682302 | -0.40779 | 5.44E-07 |
| <i>OST4</i>    | 1.890628 | 1.483645 | -0.40698 | 5.44E-07 |
| <i>OXLD1</i>   | 0.9185   | 0.527721 | -0.39078 | 5.44E-07 |

|                 |          |          |          |          |
|-----------------|----------|----------|----------|----------|
| <i>PALM3</i>    | 0.635599 | 0.298539 | -0.33706 | 5.44E-07 |
| <i>PANK3</i>    | 0.395355 | 0.760449 | 0.365094 | 1.21E-05 |
| <i>PARP10</i>   | 1.216959 | 0.843259 | -0.3737  | 5.44E-07 |
| <i>PCBP4</i>    | 0.948983 | 0.617263 | -0.33172 | 5.44E-07 |
| <i>PCOLCE</i>   | 1.265347 | 0.901918 | -0.36343 | 5.44E-07 |
| <i>PDLIM2</i>   | 1.386712 | 1.005715 | -0.381   | 5.44E-07 |
| <i>PDLIM7</i>   | 1.273189 | 0.905423 | -0.36777 | 5.44E-07 |
| <i>PDZK1IP1</i> | 1.205442 | 0.862615 | -0.34283 | 5.44E-07 |
| <i>PEBP4</i>    | 1.676196 | 1.322163 | -0.35403 | 5.44E-07 |
| <i>PEF1</i>     | 1.219722 | 0.865852 | -0.35387 | 5.44E-07 |
| <i>PEX16</i>    | 0.853533 | 0.489878 | -0.36366 | 5.44E-07 |
| <i>PFDN2</i>    | 1.489859 | 1.099023 | -0.39084 | 5.44E-07 |
| <i>PFDN5</i>    | 1.993899 | 1.62148  | -0.37242 | 5.44E-07 |
| <i>PFN1</i>     | 1.862549 | 1.402837 | -0.45971 | 5.44E-07 |
| <i>PGAP3</i>    | 1.049164 | 0.724478 | -0.32469 | 5.44E-07 |
| <i>PGLS</i>     | 1.221072 | 0.891801 | -0.32927 | 5.44E-07 |
| <i>PHPT1</i>    | 1.25032  | 0.807589 | -0.44273 | 5.44E-07 |
| <i>PIDD1</i>    | 0.705814 | 0.344688 | -0.36113 | 5.44E-07 |
| <i>PIGQ</i>     | 1.081819 | 0.735291 | -0.34653 | 5.44E-07 |
| <i>PILRB</i>    | 1.225548 | 0.897281 | -0.32827 | 5.44E-07 |
| <i>PKN1</i>     | 1.392822 | 1.066056 | -0.32677 | 5.44E-07 |
| <i>PLA2G1B</i>  | 1.210309 | 0.828271 | -0.38204 | 5.44E-07 |
| <i>PLAC9</i>    | 1.325958 | 0.867769 | -0.45819 | 5.44E-07 |
| <i>PLD3</i>     | 1.776409 | 1.431051 | -0.34536 | 5.44E-07 |
| <i>PLEKHF1</i>  | 0.771325 | 0.431081 | -0.34024 | 5.44E-07 |
| <i>PLEKHH3</i>  | 0.978862 | 0.590425 | -0.38844 | 5.44E-07 |
| <i>PMF1</i>     | 1.285939 | 0.942391 | -0.34355 | 5.44E-07 |
| <i>PMM1</i>     | 1.16666  | 0.784903 | -0.38176 | 5.44E-07 |
| <i>PNKD</i>     | 1.260651 | 0.882777 | -0.37787 | 5.44E-07 |
| <i>PNKP</i>     | 1.07564  | 0.749336 | -0.3263  | 5.44E-07 |
| <i>PNPLA2</i>   | 1.432698 | 1.071497 | -0.3612  | 5.44E-07 |
| <i>PNPLA6</i>   | 1.446655 | 1.093913 | -0.35274 | 5.44E-07 |
| <i>POLD4</i>    | 1.191645 | 0.747487 | -0.44416 | 5.44E-07 |
| <i>POLE4</i>    | 1.268972 | 0.940965 | -0.32801 | 5.44E-07 |
| <i>POLR2H</i>   | 1.173702 | 0.831405 | -0.3423  | 5.44E-07 |
| <i>POLR2I</i>   | 0.916043 | 0.584045 | -0.332   | 5.44E-07 |
| <i>POP5</i>     | 1.076942 | 0.753096 | -0.32385 | 5.44E-07 |
| <i>PPAN-P2R</i> | 0.987187 | 0.657086 | -0.3301  | 5.44E-07 |
| <i>PPDPF</i>    | 1.603121 | 1.09675  | -0.50637 | 5.44E-07 |
| <i>PPIB</i>     | 1.881295 | 1.491792 | -0.3895  | 5.44E-07 |
| <i>PPM1L</i>    | 0.222395 | 0.59862  | 0.376225 | 1.21E-05 |
| <i>PPP1R12C</i> | 1.22288  | 0.795647 | -0.42723 | 5.44E-07 |
| <i>PPP1R13L</i> | 1.039189 | 0.682124 | -0.35707 | 5.44E-07 |
| <i>PPP1R16A</i> | 0.913637 | 0.501186 | -0.41245 | 5.44E-07 |
| <i>PPP4C</i>    | 1.392089 | 1.029965 | -0.36212 | 5.44E-07 |
| <i>PQBP1</i>    | 1.410297 | 1.042905 | -0.36739 | 5.44E-07 |
| <i>PQLC1</i>    | 1.148948 | 0.822476 | -0.32647 | 5.44E-07 |
| <i>PRDX1</i>    | 2.019856 | 1.67594  | -0.34392 | 5.44E-07 |
| <i>PRDX5</i>    | 1.776107 | 1.314663 | -0.46144 | 5.44E-07 |
| <i>PRELID1</i>  | 1.000542 | 0.674575 | -0.32597 | 5.44E-07 |
| <i>PRKAR2A</i>  | 0.653308 | 1.023854 | 0.370546 | 1.21E-05 |
| <i>PRKCDBP</i>  | 1.278062 | 0.844354 | -0.43371 | 5.44E-07 |
| <i>PRKCSH</i>   | 1.579099 | 1.233842 | -0.34526 | 5.44E-07 |
| <i>PRMT1</i>    | 1.352351 | 1.00825  | -0.3441  | 5.44E-07 |
| <i>PRODH</i>    | 1.185406 | 0.827075 | -0.35833 | 5.44E-07 |
| <i>PROK2</i>    | 0.194195 | 0.546777 | 0.352581 | 1.21E-05 |

|                |          |          |          |          |
|----------------|----------|----------|----------|----------|
| <i>PRR14</i>   | 1.052582 | 0.71821  | -0.33437 | 5.44E-07 |
| <i>PRSS8</i>   | 1.385417 | 0.979392 | -0.40602 | 5.44E-07 |
| <i>PSENN</i>   | 1.293034 | 0.924692 | -0.36834 | 5.44E-07 |
| <i>PSMA7</i>   | 1.659181 | 1.279031 | -0.38015 | 5.44E-07 |
| <i>PSMB10</i>  | 1.392803 | 0.967323 | -0.42548 | 5.44E-07 |
| <i>PSMB3</i>   | 1.48776  | 1.098418 | -0.38934 | 5.44E-07 |
| <i>PSMB4</i>   | 1.73487  | 1.370649 | -0.36422 | 5.44E-07 |
| <i>PSMB6</i>   | 1.468092 | 1.089637 | -0.37845 | 5.44E-07 |
| <i>PSMB9</i>   | 1.46611  | 1.12331  | -0.3428  | 5.44E-07 |
| <i>PSMD4</i>   | 1.211956 | 0.888689 | -0.32327 | 5.44E-07 |
| <i>PSME2</i>   | 1.141943 | 0.752988 | -0.38895 | 5.44E-07 |
| <i>PTGDS</i>   | 1.99374  | 1.628232 | -0.36551 | 5.44E-07 |
| <i>PTGS2</i>   | 1.082073 | 1.48007  | 0.397997 | 1.21E-05 |
| <i>PTMS</i>    | 1.446949 | 1.08894  | -0.35801 | 5.44E-07 |
| <i>PTOV1</i>   | 1.085107 | 0.719801 | -0.36531 | 5.44E-07 |
| <i>PTPRCAP</i> | 1.170076 | 0.621623 | -0.54845 | 5.44E-07 |
| <i>PTRHD1</i>  | 1.323298 | 0.941313 | -0.38198 | 5.44E-07 |
| <i>PUF60</i>   | 1.243696 | 0.911378 | -0.33232 | 5.44E-07 |
| <i>PVRIG</i>   | 0.853604 | 0.50323  | -0.35037 | 5.44E-07 |
| <i>PWWP2B</i>  | 0.95532  | 0.619176 | -0.33614 | 5.44E-07 |
| <i>PYCARD</i>  | 1.35713  | 0.938601 | -0.41853 | 5.44E-07 |
| <i>QTRT1</i>   | 1.075263 | 0.703605 | -0.37166 | 5.44E-07 |
| <i>RAB11B</i>  | 1.455708 | 1.04828  | -0.40743 | 5.44E-07 |
| <i>RAB17</i>   | 0.981749 | 0.653123 | -0.32863 | 5.44E-07 |
| <i>RAB24</i>   | 1.106892 | 0.691867 | -0.41502 | 5.44E-07 |
| <i>RAB40C</i>  | 0.935425 | 0.60564  | -0.32979 | 5.44E-07 |
| <i>RABAC1</i>  | 1.579014 | 1.159702 | -0.41931 | 5.44E-07 |
| <i>RABEP2</i>  | 0.800994 | 0.456423 | -0.34457 | 5.44E-07 |
| <i>RAD54L2</i> | 0.528163 | 0.869522 | 0.341359 | 1.21E-05 |
| <i>RAMP2</i>   | 1.600941 | 1.267813 | -0.33313 | 5.44E-07 |
| <i>RAMP3</i>   | 1.346952 | 1.012955 | -0.334   | 5.44E-07 |
| <i>RANGRF</i>  | 1.064121 | 0.739303 | -0.32482 | 5.44E-07 |
| <i>RARRES2</i> | 1.802842 | 1.385513 | -0.41733 | 5.44E-07 |
| <i>RARRES3</i> | 1.556317 | 1.196987 | -0.35933 | 5.44E-07 |
| <i>RASSF7</i>  | 1.332149 | 0.719613 | -0.61254 | 5.44E-07 |
| <i>RBCK1</i>   | 1.23817  | 0.877162 | -0.36101 | 5.44E-07 |
| <i>RBM42</i>   | 1.314713 | 0.926531 | -0.38818 | 5.44E-07 |
| <i>RBP1</i>    | 1.054222 | 0.722427 | -0.33179 | 5.44E-07 |
| <i>RC3H2</i>   | 0.436342 | 0.761522 | 0.325179 | 1.21E-05 |
| <i>RCN3</i>    | 0.966162 | 0.616169 | -0.34999 | 5.44E-07 |
| <i>RDH5</i>    | 1.613051 | 1.21156  | -0.40149 | 5.44E-07 |
| <i>REL</i>     | 0.449746 | 0.899385 | 0.449639 | 1.21E-05 |
| <i>RETN</i>    | 1.327204 | 0.920233 | -0.40697 | 5.44E-07 |
| <i>RFXANK</i>  | 1.144581 | 0.805284 | -0.3393  | 5.44E-07 |
| <i>RGL3</i>    | 1.089554 | 0.745967 | -0.34359 | 5.44E-07 |
| <i>RHBDD2</i>  | 1.495159 | 1.163989 | -0.33117 | 5.44E-07 |
| <i>RHOC</i>    | 1.504645 | 1.138503 | -0.36614 | 5.44E-07 |
| <i>RHOT2</i>   | 1.293176 | 0.900791 | -0.39239 | 5.44E-07 |
| <i>RNASE1</i>  | 2.240185 | 1.819661 | -0.42052 | 5.44E-07 |
| <i>RNASEK</i>  | 1.828564 | 1.475174 | -0.35339 | 5.44E-07 |
| <i>RNF181</i>  | 1.307348 | 0.916231 | -0.39112 | 5.44E-07 |
| <i>RNF24</i>   | 0.49938  | 0.848426 | 0.349046 | 1.21E-05 |
| <i>RNH1</i>    | 1.548152 | 1.150045 | -0.39811 | 5.44E-07 |
| <i>RNPEPL1</i> | 1.196652 | 0.845213 | -0.35144 | 5.44E-07 |
| <i>ROGDI</i>   | 1.084049 | 0.697126 | -0.38692 | 5.44E-07 |
| <i>RPL11</i>   | 2.264101 | 1.878604 | -0.3855  | 5.44E-07 |

|                 |          |          |          |          |
|-----------------|----------|----------|----------|----------|
| <i>RPL13A</i>   | 1.596155 | 1.230509 | -0.36565 | 5.44E-07 |
| <i>RPL18</i>    | 1.69945  | 1.268276 | -0.43117 | 5.44E-07 |
| <i>RPL19</i>    | 1.73124  | 1.287429 | -0.44381 | 5.44E-07 |
| <i>RPL23A</i>   | 1.067115 | 0.620664 | -0.44645 | 5.44E-07 |
| <i>RPL26</i>    | 1.596297 | 1.041442 | -0.55485 | 5.44E-07 |
| <i>RPL27</i>    | 1.948079 | 1.440542 | -0.50754 | 5.44E-07 |
| <i>RPL28</i>    | 1.956459 | 1.224502 | -0.73196 | 5.44E-07 |
| <i>RPL29</i>    | 1.635724 | 1.179812 | -0.45591 | 5.44E-07 |
| <i>RPL31</i>    | 2.203544 | 1.881576 | -0.32197 | 5.44E-07 |
| <i>RPL34</i>    | 1.925526 | 1.544261 | -0.38126 | 5.44E-07 |
| <i>RPL35</i>    | 2.091507 | 0.991533 | -1.09997 | 5.44E-07 |
| <i>RPL35A</i>   | 2.438379 | 1.932752 | -0.50563 | 5.44E-07 |
| <i>RPL36</i>    | 1.968693 | 1.48379  | -0.4849  | 5.44E-07 |
| <i>RPL36AL</i>  | 2.102832 | 1.655266 | -0.44757 | 5.44E-07 |
| <i>RPL39</i>    | 1.16817  | 0.80277  | -0.3654  | 5.44E-07 |
| <i>RPL7A</i>    | 1.416476 | 0.939805 | -0.47667 | 5.44E-07 |
| <i>RPL8</i>     | 2.274599 | 1.71829  | -0.55631 | 5.44E-07 |
| <i>RPLP1</i>    | 2.337686 | 1.539823 | -0.79786 | 5.44E-07 |
| <i>RPLP2</i>    | 2.623598 | 1.75181  | -0.87179 | 5.44E-07 |
| <i>RPS11</i>    | 1.994871 | 1.559298 | -0.43557 | 5.44E-07 |
| <i>RPS12</i>    | 1.75709  | 1.004126 | -0.75296 | 5.44E-07 |
| <i>RPS15A</i>   | 2.10636  | 1.758473 | -0.34789 | 5.44E-07 |
| <i>RPS16</i>    | 2.092233 | 1.518272 | -0.57396 | 5.44E-07 |
| <i>RPS19</i>    | 1.820536 | 1.430973 | -0.38956 | 5.44E-07 |
| <i>RPS19BP1</i> | 1.231397 | 0.761117 | -0.47028 | 5.44E-07 |
| <i>RPS21</i>    | 2.1772   | 1.83987  | -0.33733 | 5.44E-07 |
| <i>RPS24</i>    | 1.977922 | 1.359934 | -0.61799 | 5.44E-07 |
| <i>RPS28</i>    | 0.985237 | 0.541668 | -0.44357 | 5.44E-07 |
| <i>RPS4X</i>    | 2.039251 | 1.648242 | -0.39101 | 5.44E-07 |
| <i>RPS4Y1</i>   | 1.682644 | 1.35054  | -0.3321  | 5.44E-07 |
| <i>RPS6KB2</i>  | 0.991136 | 0.650016 | -0.34112 | 5.44E-07 |
| <i>RPS7</i>     | 0.889088 | 0.511782 | -0.37731 | 5.44E-07 |
| <i>RPS8</i>     | 1.828352 | 1.39114  | -0.43721 | 5.44E-07 |
| <i>RPUSD1</i>   | 0.715226 | 0.368928 | -0.3463  | 5.44E-07 |
| <i>RRAS</i>     | 1.591227 | 1.128879 | -0.46235 | 5.44E-07 |
| <i>RSRP1</i>    | 1.442837 | 1.103413 | -0.33942 | 5.44E-07 |
| <i>RUVBL2</i>   | 1.133906 | 0.754201 | -0.37971 | 5.44E-07 |
| <i>S100A10</i>  | 2.163782 | 1.711128 | -0.45265 | 5.44E-07 |
| <i>S100A11</i>  | 2.082999 | 1.649117 | -0.43388 | 5.44E-07 |
| <i>S100A12</i>  | 0.574043 | 0.977039 | 0.402996 | 1.21E-05 |
| <i>S100A13</i>  | 1.712501 | 1.302882 | -0.40962 | 5.44E-07 |
| <i>S100A14</i>  | 1.498542 | 1.106383 | -0.39216 | 5.44E-07 |
| <i>S100A4</i>   | 2.519145 | 1.929016 | -0.59013 | 5.44E-07 |
| <i>S100A6</i>   | 2.590091 | 1.853254 | -0.73684 | 5.44E-07 |
| <i>S1PR4</i>    | 0.852701 | 0.515738 | -0.33696 | 5.44E-07 |
| <i>SAC3D1</i>   | 0.616649 | 0.27361  | -0.34304 | 5.44E-07 |
| <i>SAP25</i>    | 0.671528 | 0.340722 | -0.33081 | 5.44E-07 |
| <i>SAT2</i>     | 1.255296 | 0.906165 | -0.34913 | 5.44E-07 |
| <i>SCAND1</i>   | 1.161179 | 0.632438 | -0.52874 | 5.44E-07 |
| <i>SCGB1A1</i>  | 2.223526 | 1.76441  | -0.45912 | 0.000297 |
| <i>SCGB3A1</i>  | 1.802801 | 1.227313 | -0.57549 | 5.44E-07 |
| <i>SCGB3A2</i>  | 2.333292 | 2.009274 | -0.32402 | 1.04E-06 |
| <i>SCRN2</i>    | 1.048839 | 0.692138 | -0.3567  | 5.44E-07 |
| <i>SDE2</i>     | 0.648183 | 1.013047 | 0.364864 | 1.21E-05 |
| <i>SDR39U1</i>  | 1.155225 | 0.709736 | -0.44549 | 5.44E-07 |
| <i>SEC61B</i>   | 1.666212 | 0.985479 | -0.68073 | 5.44E-07 |

|                 |          |          |          |          |
|-----------------|----------|----------|----------|----------|
| <i>SELE</i>     | 0.564013 | 0.925975 | 0.361962 | 1.21E-05 |
| <i>SELENBP</i>  | 1.799456 | 1.403056 | -0.3964  | 5.44E-07 |
| <i>SEMA3B</i>   | 1.422578 | 0.971014 | -0.45156 | 5.44E-07 |
| <i>SEPW1</i>    | 1.714329 | 1.243154 | -0.47118 | 5.44E-07 |
| <i>SERPINE1</i> | 0.819436 | 1.199968 | 0.380532 | 1.21E-05 |
| <i>SF3A2</i>    | 1.055574 | 0.707376 | -0.3482  | 5.44E-07 |
| <i>SF3B5</i>    | 1.522549 | 1.115805 | -0.40674 | 5.44E-07 |
| <i>SFTA2</i>    | 1.883168 | 1.434808 | -0.44836 | 5.44E-07 |
| <i>SFTPA1</i>   | 2.847935 | 2.490832 | -0.3571  | 5.44E-07 |
| <i>SFTPA2</i>   | 2.936417 | 2.573137 | -0.36328 | 5.44E-07 |
| <i>SFTPB</i>    | 2.553771 | 2.191749 | -0.36202 | 5.44E-07 |
| <i>SFTPC</i>    | 3.293278 | 2.40338  | -0.8899  | 5.44E-07 |
| <i>SGMS2</i>    | 0.97186  | 1.298313 | 0.326453 | 1.21E-05 |
| <i>SGPP2</i>    | 0.701003 | 1.024413 | 0.323411 | 1.21E-05 |
| <i>SH2B1</i>    | 1.090583 | 0.731222 | -0.35936 | 5.44E-07 |
| <i>SH3BGRL</i>  | 1.725603 | 1.242007 | -0.4836  | 5.44E-07 |
| <i>SHARPIN</i>  | 1.055858 | 0.647197 | -0.40866 | 5.44E-07 |
| <i>SHC2</i>     | 0.846654 | 0.469231 | -0.37742 | 5.44E-07 |
| <i>SHFM1</i>    | 1.856783 | 1.343742 | -0.51304 | 5.44E-07 |
| <i>SIGIRR</i>   | 1.105178 | 0.696652 | -0.40853 | 5.44E-07 |
| <i>SIRT7</i>    | 0.953107 | 0.612151 | -0.34096 | 5.44E-07 |
| <i>SIVA1</i>    | 1.354859 | 0.920861 | -0.434   | 5.44E-07 |
| <i>SLC19A1</i>  | 1.14772  | 0.791392 | -0.35633 | 5.44E-07 |
| <i>SLC22A31</i> | 1.092283 | 0.718572 | -0.37371 | 5.44E-07 |
| <i>SLC25A29</i> | 1.215101 | 0.806039 | -0.40906 | 5.44E-07 |
| <i>SLC25A39</i> | 1.272584 | 0.878998 | -0.39359 | 5.44E-07 |
| <i>SLC39A13</i> | 1.128696 | 0.794893 | -0.3338  | 5.44E-07 |
| <i>SLC39A3</i>  | 0.97246  | 0.633126 | -0.33933 | 5.44E-07 |
| <i>SLC6A14</i>  | 0.813572 | 1.195726 | 0.382154 | 1.21E-05 |
| <i>SLC7A2</i>   | 0.636757 | 0.96597  | 0.329214 | 1.21E-05 |
| <i>SLC9A3R2</i> | 1.376223 | 1.029814 | -0.34641 | 5.44E-07 |
| <i>SLFN5</i>    | 0.760544 | 1.148388 | 0.387844 | 1.21E-05 |
| <i>SLPI</i>     | 2.374571 | 2.043755 | -0.33082 | 5.44E-07 |
| <i>SMUG1</i>    | 0.941172 | 0.584686 | -0.35649 | 5.44E-07 |
| <i>SNAPC2</i>   | 0.889815 | 0.557188 | -0.33263 | 5.44E-07 |
| <i>SNRNP35</i>  | 1.16199  | 0.82738  | -0.33461 | 5.44E-07 |
| <i>SNRNP70</i>  | 1.687553 | 1.231333 | -0.45622 | 5.44E-07 |
| <i>SNRPA</i>    | 1.09529  | 0.758466 | -0.33682 | 5.44E-07 |
| <i>SNRPD2</i>   | 1.508078 | 1.110969 | -0.39711 | 5.44E-07 |
| <i>SORBS3</i>   | 1.4264   | 1.081054 | -0.34535 | 5.44E-07 |
| <i>SPAG7</i>    | 1.319034 | 0.948447 | -0.37059 | 5.44E-07 |
| <i>SPG7</i>     | 1.221626 | 0.898841 | -0.32278 | 5.44E-07 |
| <i>SPINT2</i>   | 1.722466 | 1.322147 | -0.40032 | 5.44E-07 |
| <i>SPNS1</i>    | 1.229679 | 0.804567 | -0.42511 | 5.44E-07 |
| <i>SPON2</i>    | 1.231456 | 0.840242 | -0.39121 | 5.44E-07 |
| <i>SPSB2</i>    | 0.865379 | 0.496481 | -0.3689  | 5.44E-07 |
| <i>SPSB3</i>    | 1.261106 | 0.699447 | -0.56166 | 5.44E-07 |
| <i>SSNA1</i>    | 1.167017 | 0.797563 | -0.36945 | 5.44E-07 |
| <i>SSR4</i>     | 1.735234 | 1.318874 | -0.41636 | 5.44E-07 |
| <i>ST8SIA6</i>  | 0.236291 | 0.675047 | 0.438756 | 1.21E-05 |
| <i>STRA13</i>   | 1.174114 | 0.680341 | -0.49377 | 5.44E-07 |
| <i>STUB1</i>    | 1.28965  | 0.850124 | -0.43953 | 5.44E-07 |
| <i>STX10</i>    | 1.193514 | 0.829027 | -0.36449 | 5.44E-07 |
| <i>STX8</i>     | 1.311998 | 0.849108 | -0.46289 | 5.44E-07 |
| <i>STXBP2</i>   | 1.348864 | 0.992101 | -0.35676 | 5.44E-07 |
| <i>SURF1</i>    | 1.183245 | 0.840201 | -0.34304 | 5.44E-07 |

|                 |          |          |          |          |
|-----------------|----------|----------|----------|----------|
| <i>SURF2</i>    | 0.838679 | 0.494913 | -0.34377 | 5.44E-07 |
| <i>SUSD2</i>    | 1.67622  | 1.288537 | -0.38768 | 5.44E-07 |
| <i>SYNGR2</i>   | 1.547356 | 1.19148  | -0.35588 | 5.44E-07 |
| <i>SYTL1</i>    | 1.003935 | 0.663956 | -0.33998 | 5.44E-07 |
| <i>TACSTD2</i>  | 1.671438 | 1.337406 | -0.33403 | 5.44E-07 |
| <i>TAF1C</i>    | 1.206769 | 0.854716 | -0.35205 | 5.44E-07 |
| <i>TAGLN</i>    | 1.84421  | 1.459676 | -0.38453 | 5.44E-07 |
| <i>TAZ</i>      | 1.023345 | 0.680057 | -0.34329 | 5.44E-07 |
| <i>TBC1D10C</i> | 1.035253 | 0.628418 | -0.40683 | 5.44E-07 |
| <i>TBCB</i>     | 1.270393 | 0.859756 | -0.41064 | 5.44E-07 |
| <i>TBL3</i>     | 0.846692 | 0.498118 | -0.34857 | 5.44E-07 |
| <i>TBX2</i>     | 1.322005 | 0.97924  | -0.34276 | 5.44E-07 |
| <i>TCEB2</i>    | 1.592602 | 1.097565 | -0.49504 | 5.44E-07 |
| <i>TCF21</i>    | 1.455959 | 1.129738 | -0.32622 | 5.44E-07 |
| <i>TCIRG1</i>   | 1.503268 | 1.046861 | -0.45641 | 5.44E-07 |
| <i>TEX264</i>   | 1.103587 | 0.745721 | -0.35787 | 5.44E-07 |
| <i>TFPT</i>     | 0.867548 | 0.516465 | -0.35108 | 5.44E-07 |
| <i>TIMP1</i>    | 1.727927 | 1.392583 | -0.33534 | 5.44E-07 |
| <i>TKT</i>      | 1.617794 | 1.292534 | -0.32526 | 5.44E-07 |
| <i>TLE2</i>     | 1.269178 | 0.922544 | -0.34663 | 5.44E-07 |
| <i>TM7SF2</i>   | 1.319396 | 0.954429 | -0.36497 | 5.44E-07 |
| <i>TMA7</i>     | 0.652305 | 0.315235 | -0.33707 | 5.44E-07 |
| <i>TMED3</i>    | 1.250574 | 0.915088 | -0.33549 | 5.44E-07 |
| <i>TMED8</i>    | 0.291547 | 0.649292 | 0.357745 | 1.21E-05 |
| <i>TMED9</i>    | 1.576804 | 1.250873 | -0.32593 | 5.44E-07 |
| <i>TMEM125</i>  | 1.511935 | 1.11122  | -0.40071 | 5.44E-07 |
| <i>TMEM134</i>  | 1.109814 | 0.687343 | -0.42247 | 5.44E-07 |
| <i>TMEM154</i>  | 0.400006 | 0.732505 | 0.332499 | 1.21E-05 |
| <i>TMEM204</i>  | 1.153057 | 0.804742 | -0.34832 | 5.44E-07 |
| <i>TMEM205</i>  | 1.406828 | 1.064432 | -0.3424  | 5.44E-07 |
| <i>TMEM219</i>  | 1.469089 | 1.060932 | -0.40816 | 5.44E-07 |
| <i>TMEM256-</i> | 1.571267 | 1.107975 | -0.46329 | 5.44E-07 |
| <i>TMEM258</i>  | 1.942045 | 1.464584 | -0.47746 | 5.44E-07 |
| <i>TMEM259</i>  | 1.568386 | 1.138007 | -0.43038 | 5.44E-07 |
| <i>TMEM74B</i>  | 1.05827  | 0.671821 | -0.38645 | 5.44E-07 |
| <i>TMSB10</i>   | 2.572698 | 1.959722 | -0.61298 | 5.44E-07 |
| <i>TMSB4X</i>   | 2.492791 | 1.685914 | -0.80688 | 5.44E-07 |
| <i>TMUB1</i>    | 1.070708 | 0.645461 | -0.42525 | 5.44E-07 |
| <i>TNFRSF1</i>  | 1.043061 | 0.669    | -0.37406 | 5.44E-07 |
| <i>TNIP3</i>    | 0.242042 | 0.613624 | 0.371582 | 1.21E-05 |
| <i>TNK2</i>     | 1.032433 | 0.68223  | -0.3502  | 5.44E-07 |
| <i>TNNC1</i>    | 1.450076 | 1.051813 | -0.39826 | 5.44E-07 |
| <i>TOMM6</i>    | 1.510223 | 1.006454 | -0.50377 | 5.44E-07 |
| <i>TP53I13</i>  | 1.092663 | 0.632201 | -0.46046 | 5.44E-07 |
| <i>TPM2</i>     | 1.517872 | 1.04418  | -0.47369 | 5.44E-07 |
| <i>TPPP3</i>    | 1.635724 | 1.114255 | -0.52147 | 5.44E-07 |
| <i>TRABD</i>    | 1.094478 | 0.703699 | -0.39078 | 5.44E-07 |
| <i>TRADD</i>    | 1.077995 | 0.750849 | -0.32715 | 5.44E-07 |
| <i>TRAPPC2</i>  | 1.228563 | 0.811006 | -0.41756 | 5.44E-07 |
| <i>TRAPPC6</i>  | 1.156101 | 0.695555 | -0.46055 | 5.44E-07 |
| <i>TRIM28</i>   | 1.361435 | 1.028142 | -0.33329 | 5.44E-07 |
| <i>TRIM39</i>   | 1.263165 | 0.907963 | -0.3552  | 5.44E-07 |
| <i>TRIP6</i>    | 1.167339 | 0.815336 | -0.352   | 5.44E-07 |
| <i>TRMT1</i>    | 0.954571 | 0.623145 | -0.33143 | 5.44E-07 |
| <i>TRMT112</i>  | 1.0157   | 0.676294 | -0.33941 | 5.44E-07 |
| <i>TSPAN4</i>   | 1.422349 | 0.962762 | -0.45959 | 5.44E-07 |

|                 |          |          |          |          |
|-----------------|----------|----------|----------|----------|
| <i>TSPO</i>     | 1.707878 | 1.280328 | -0.42755 | 5.44E-07 |
| <i>TSSC4</i>    | 0.987663 | 0.638087 | -0.34958 | 5.44E-07 |
| <i>TST</i>      | 1.100666 | 0.716128 | -0.38454 | 5.44E-07 |
| <i>TSTD1</i>    | 1.450456 | 0.997694 | -0.45276 | 5.44E-07 |
| <i>TBK2</i>     | 0.224871 | 0.557917 | 0.333046 | 1.21E-05 |
| <i>TUBA1B</i>   | 1.533068 | 1.177187 | -0.35588 | 5.44E-07 |
| <i>TUBA1C</i>   | 1.46582  | 1.117262 | -0.34856 | 5.44E-07 |
| <i>TWF2</i>     | 1.281803 | 0.936372 | -0.34543 | 5.44E-07 |
| <i>TYMP</i>     | 1.623051 | 1.16024  | -0.46281 | 5.44E-07 |
| <i>TYROBP</i>   | 2.017076 | 1.517129 | -0.49995 | 5.44E-07 |
| <i>UBALD1</i>   | 0.973912 | 0.615061 | -0.35885 | 5.44E-07 |
| <i>UBB</i>      | 2.162252 | 1.817078 | -0.34517 | 5.44E-07 |
| <i>UBL5</i>     | 1.757685 | 1.267727 | -0.48996 | 5.44E-07 |
| <i>UBTD1</i>    | 1.119015 | 0.768144 | -0.35087 | 5.44E-07 |
| <i>UBXN1</i>    | 1.428238 | 1.058671 | -0.36957 | 5.44E-07 |
| <i>UBXN6</i>    | 1.317049 | 0.934327 | -0.38272 | 5.44E-07 |
| <i>UBXN7</i>    | 0.369423 | 0.873036 | 0.503613 | 1.21E-05 |
| <i>UNC13D</i>   | 1.202901 | 0.877425 | -0.32548 | 5.44E-07 |
| <i>UNC93B1</i>  | 1.178294 | 0.854363 | -0.32393 | 5.44E-07 |
| <i>UPK3B</i>    | 1.347562 | 1.012346 | -0.33522 | 5.44E-07 |
| <i>UQCRHL</i>   | 1.720798 | 1.345689 | -0.37511 | 5.44E-07 |
| <i>URGCP</i>    | 1.42958  | 1.002669 | -0.42691 | 5.44E-07 |
| <i>UXT</i>      | 1.488469 | 1.147274 | -0.3412  | 5.44E-07 |
| <i>VAMP5</i>    | 1.486354 | 1.027733 | -0.45862 | 5.44E-07 |
| <i>VAMP8</i>    | 1.833111 | 1.356971 | -0.47614 | 5.44E-07 |
| <i>VIM</i>      | 2.35121  | 1.961529 | -0.38968 | 5.44E-07 |
| <i>VKORC1</i>   | 1.427437 | 1.089591 | -0.33785 | 5.44E-07 |
| <i>VMO1</i>     | 0.863088 | 0.535312 | -0.32778 | 5.44E-07 |
| <i>VPS28</i>    | 1.548679 | 1.067707 | -0.48097 | 5.44E-07 |
| <i>VSIG2</i>    | 1.173908 | 0.764368 | -0.40954 | 5.44E-07 |
| <i>WBP1</i>     | 1.297629 | 0.948014 | -0.34961 | 5.44E-07 |
| <i>WDR13</i>    | 1.276319 | 0.917082 | -0.35924 | 5.44E-07 |
| <i>WDR18</i>    | 0.990977 | 0.553166 | -0.43781 | 5.44E-07 |
| <i>WDR34</i>    | 1.13498  | 0.774309 | -0.36067 | 5.44E-07 |
| <i>WDR830S</i>  | 1.526158 | 1.08712  | -0.43904 | 5.44E-07 |
| <i>WFDC2</i>    | 1.597453 | 1.171354 | -0.4261  | 5.44E-07 |
| <i>XAB2</i>     | 1.100085 | 0.763234 | -0.33685 | 5.44E-07 |
| <i>YPEL3</i>    | 1.399811 | 1.044327 | -0.35548 | 5.44E-07 |
| <i>ZAP70</i>    | 0.856386 | 0.522426 | -0.33396 | 5.44E-07 |
| <i>ZBED6</i>    | 0.173182 | 0.615256 | 0.442074 | 1.21E-05 |
| <i>ZBTB16</i>   | 0.681278 | 1.01169  | 0.330412 | 1.21E-05 |
| <i>ZC3HAV1L</i> | 0.313601 | 0.708728 | 0.395127 | 1.21E-05 |
| <i>ZDHC12</i>   | 0.980345 | 0.637852 | -0.34249 | 5.44E-07 |
| <i>ZFAND2B</i>  | 0.973904 | 0.633154 | -0.34075 | 5.44E-07 |
| <i>ZGPAT</i>    | 1.12566  | 0.715415 | -0.41024 | 5.44E-07 |
| <i>ZNF121</i>   | 0.483845 | 0.834871 | 0.351026 | 1.21E-05 |
| <i>ZNF205</i>   | 0.6771   | 0.332571 | -0.34453 | 5.44E-07 |
| <i>ZNF219</i>   | 0.996803 | 0.632482 | -0.36432 | 5.44E-07 |
| <i>ZNF358</i>   | 1.197384 | 0.800242 | -0.39714 | 5.44E-07 |
| <i>ZNF428</i>   | 1.036167 | 0.693801 | -0.34237 | 5.44E-07 |
| <i>ZNF444</i>   | 0.991453 | 0.602797 | -0.38866 | 5.44E-07 |
| <i>ZNF524</i>   | 0.882149 | 0.488309 | -0.39384 | 5.44E-07 |
| <i>ZNF593</i>   | 1.125006 | 0.763674 | -0.36133 | 5.44E-07 |
| <i>ZNF688</i>   | 0.720799 | 0.350345 | -0.37045 | 5.44E-07 |
| <i>ZNF791</i>   | 0.622025 | 0.968539 | 0.346514 | 1.21E-05 |
| <i>ZNHIT1</i>   | 1.181779 | 0.824538 | -0.35724 | 5.44E-07 |
