# Supplementary material for: Evaluation and Interpretation of Transcriptome Data Underlying Heterogeneous Chronic Obstructive Pulmonary Disease
Source: PubMed Central journal article supplement (PMC6459164; doi:10.5808/gi.2019.17.1.e2), 2019-03-31
Supplement: gi-2019-17-1-e2-suppl5.pdf [file gi-2019-17-1-e2-suppl5.pdf]

**Supplementary Table 2.** List of differentially expressed pairs determined by maximal information coefficient

| Gene1          | Gene2           | NOR     | COPD    | Difference |
|----------------|-----------------|---------|---------|------------|
| <i>A1CF</i>    | <i>APOBEC1</i>  | 0.91026 | 0.29687 | -0.61339   |
| <i>ABHD16A</i> | <i>HM13</i>     | 0.29536 | 0.70433 | 0.40897    |
| <i>ACMSD</i>   | <i>MAGEA11</i>  | 0.6906  | 0.29046 | -0.40014   |
| <i>ACTB</i>    | <i>ACTG1</i>    | 0.36761 | 0.78657 | 0.41896    |
| <i>ACTB</i>    | <i>ARPC1B</i>   | 0.22049 | 0.6484  | 0.42791    |
| <i>ACTB</i>    | <i>ATP5A1</i>   | 0.21327 | 0.64286 | 0.42959    |
| <i>ACTB</i>    | <i>CD81</i>     | 0.26187 | 0.6641  | 0.40223    |
| <i>ACTB</i>    | <i>CFL1</i>     | 0.25233 | 0.71049 | 0.45816    |
| <i>ACTB</i>    | <i>CSNK2B</i>   | 0.29712 | 0.71283 | 0.41571    |
| <i>ACTB</i>    | <i>DYNLL1</i>   | 0.17759 | 0.59702 | 0.41943    |
| <i>ACTB</i>    | <i>EIF3D</i>    | 0.20648 | 0.66509 | 0.45861    |
| <i>ACTB</i>    | <i>EIF3K</i>    | 0.22198 | 0.68719 | 0.46521    |
| <i>ACTB</i>    | <i>FBL</i>      | 0.17365 | 0.69792 | 0.52427    |
| <i>ACTB</i>    | <i>GNB2L1</i>   | 0.25168 | 0.74101 | 0.48933    |
| <i>ACTB</i>    | <i>HNRNPH1</i>  | 0.20252 | 0.60845 | 0.40593    |
| <i>ACTB</i>    | <i>LASP1</i>    | 0.24578 | 0.70179 | 0.45601    |
| <i>ACTB</i>    | <i>MGMT</i>     | 0.17675 | 0.58343 | 0.40668    |
| <i>ACTB</i>    | <i>MYL12B</i>   | 0.20761 | 0.6409  | 0.43329    |
| <i>ACTB</i>    | <i>OTUB1</i>    | 0.18221 | 0.64917 | 0.46696    |
| <i>ACTB</i>    | <i>PFN1</i>     | 0.24885 | 0.75623 | 0.50738    |
| <i>ACTB</i>    | <i>PPP1CA</i>   | 0.16824 | 0.59347 | 0.42523    |
| <i>ACTB</i>    | <i>RAC1</i>     | 0.23157 | 0.67685 | 0.44528    |
| <i>ACTB</i>    | <i>RPLP1</i>    | 0.2297  | 0.67794 | 0.44824    |
| <i>ACTB</i>    | <i>RPS19</i>    | 0.18255 | 0.67013 | 0.48758    |
| <i>ACTB</i>    | <i>RPS4X</i>    | 0.17226 | 0.61277 | 0.44051    |
| <i>ACTB</i>    | <i>S100A11</i>  | 0.15268 | 0.57572 | 0.42304    |
| <i>ACTB</i>    | <i>SSRP1</i>    | 0.23767 | 0.64258 | 0.40491    |
| <i>ACTB</i>    | <i>VIM</i>      | 0.1783  | 0.70848 | 0.53018    |
| <i>ACTG1</i>   | <i>BRK1</i>     | 0.21097 | 0.63363 | 0.42266    |
| <i>ACTG1</i>   | <i>CFL1</i>     | 0.20194 | 0.62587 | 0.42393    |
| <i>ACTG1</i>   | <i>LGALS13</i>  | 0.2264  | 0.6359  | 0.4095     |
| <i>ACTN4</i>   | <i>TJP1</i>     | 0.71628 | 0.27715 | -0.43913   |
| <i>ACTR2</i>   | <i>ACTR3</i>    | 0.84491 | 0.38579 | -0.45912   |
| <i>ACTR2</i>   | <i>ARPC5</i>    | 0.72226 | 0.31881 | -0.40345   |
| <i>ADRM1</i>   | <i>RPN1</i>     | 0.22124 | 0.67247 | 0.45123    |
| <i>AFF1</i>    | <i>DDX6</i>     | 0.73913 | 0.30994 | -0.42919   |
| <i>AHCYL1</i>  | <i>YAP1</i>     | 0.76229 | 0.34422 | -0.41807   |
| <i>AIRE</i>    | <i>HIST1H3B</i> | 0.69963 | 0.29844 | -0.40119   |
| <i>AIRE</i>    | <i>HIST1H3C</i> | 0.73587 | 0.22695 | -0.50892   |
| <i>AIRE</i>    | <i>HIST1H3F</i> | 0.70235 | 0.28071 | -0.42164   |
| <i>AKT3</i>    | <i>APPL1</i>    | 0.76203 | 0.35147 | -0.41056   |
| <i>ALDOA</i>   | <i>DYNLL1</i>   | 0.21945 | 0.66711 | 0.44766    |
| <i>ALDOA</i>   | <i>LGALS1</i>   | 0.22467 | 0.74864 | 0.52397    |
| <i>ANP32E</i>  | <i>FYTTD1</i>   | 0.82805 | 0.37141 | -0.45664   |
| <i>ANXA11</i>  | <i>HLA-DRB4</i> | 0.19461 | 0.63651 | 0.4419     |
| <i>AP2A1</i>   | <i>BIN1</i>     | 0.24925 | 0.65195 | 0.4027     |
| <i>APCS</i>    | <i>CRP</i>      | 0.78423 | 0.2859  | -0.49833   |
| <i>APCS</i>    | <i>MBL2</i>     | 1       | 0.44444 | -0.55556   |
| <i>APEX1</i>   | <i>LGALS1</i>   | 0.23475 | 0.64119 | 0.40644    |
| <i>APOA2</i>   | <i>APOF</i>     | 0.76891 | 0.36179 | -0.40712   |
| <i>ARCN1</i>   | <i>COPB2</i>    | 0.8913  | 0.35569 | -0.53561   |
| <i>ARCN1</i>   | <i>COPE</i>     | 0.73118 | 0.28376 | -0.44742   |
| <i>ARF1</i>    | <i>COPE</i>     | 0.19114 | 0.74353 | 0.55239    |

|                 |                 |         |         |          |
|-----------------|-----------------|---------|---------|----------|
| <i>ARID1A</i>   | <i>ITCH</i>     | 0.67517 | 0.22209 | -0.45308 |
| <i>ARR3</i>     | <i>FSHR</i>     | 0.7381  | 0.30534 | -0.43276 |
| <i>ARR3</i>     | <i>OPN1MW</i>   | 0.96438 | 0.39877 | -0.56561 |
| <i>ARR3</i>     | <i>OPN4</i>     | 0.7579  | 0.30211 | -0.45579 |
| <i>ATF2</i>     | <i>DISC1</i>    | 0.74165 | 0.34137 | -0.40028 |
| <i>ATF2</i>     | <i>MAPK1</i>    | 0.76697 | 0.30948 | -0.45749 |
| <i>ATP4A</i>    | <i>GIF</i>      | 0.90386 | 0.3382  | -0.56566 |
| <i>ATP5B</i>    | <i>P4HB</i>     | 0.26905 | 0.68481 | 0.41576  |
| <i>AUP1</i>     | <i>SPTLC1</i>   | 0.66258 | 0.25706 | -0.40552 |
| <i>AVP</i>      | <i>AVPR1B</i>   | 1       | 0.4728  | -0.5272  |
| <i>BAG6</i>     | <i>NR1H2</i>    | 0.25228 | 0.66154 | 0.40926  |
| <i>BAG6</i>     | <i>PRDX5</i>    | 0.24232 | 0.66286 | 0.42054  |
| <i>BAP1</i>     | <i>UBE2V1</i>   | 0.19427 | 0.70784 | 0.51357  |
| <i>BCL2</i>     | <i>PPP3R1</i>   | 0.66452 | 0.23996 | -0.42456 |
| <i>BCL7C</i>    | <i>SMARCA4</i>  | 0.23851 | 0.64159 | 0.40308  |
| <i>BIN1</i>     | <i>DNM2</i>     | 0.22089 | 0.62113 | 0.40024  |
| <i>BOLL</i>     | <i>DAZ2</i>     | 0.93902 | 0.52329 | -0.41573 |
| <i>BSG</i>      | <i>OS9</i>      | 0.25737 | 0.78148 | 0.52411  |
| <i>BSG</i>      | <i>RANBP3</i>   | 0.25721 | 0.66659 | 0.40938  |
| <i>C10orf62</i> | <i>KRTAP4-1</i> | 0.78474 | 0.34587 | -0.43887 |
| <i>CALM1</i>    | <i>HUWE1</i>    | 0.72377 | 0.31166 | -0.41211 |
| <i>CALM1</i>    | <i>RDX</i>      | 0.69489 | 0.27266 | -0.42223 |
| <i>CAND1</i>    | <i>CANX</i>     | 0.77236 | 0.35287 | -0.41949 |
| <i>CAND1</i>    | <i>CAPRIN1</i>  | 0.82692 | 0.3758  | -0.45112 |
| <i>CAND1</i>    | <i>DDX6</i>     | 0.91016 | 0.49315 | -0.41701 |
| <i>CAND1</i>    | <i>FUBP3</i>    | 0.66941 | 0.2487  | -0.42071 |
| <i>CAND1</i>    | <i>H2AFV</i>    | 0.72391 | 0.30544 | -0.41847 |
| <i>CAND1</i>    | <i>HSPA4</i>    | 0.79785 | 0.36416 | -0.43369 |
| <i>CAND1</i>    | <i>OPA1</i>     | 0.7981  | 0.37892 | -0.41918 |
| <i>CAND1</i>    | <i>POLR2B</i>   | 0.77548 | 0.37225 | -0.40323 |
| <i>CAND1</i>    | <i>SERBP1</i>   | 0.64253 | 0.23671 | -0.40582 |
| <i>CANX</i>     | <i>GANAB</i>    | 0.77189 | 0.35928 | -0.41261 |
| <i>CANX</i>     | <i>LMAN1</i>    | 0.80841 | 0.40531 | -0.4031  |
| <i>CANX</i>     | <i>SUMO3</i>    | 0.74426 | 0.31763 | -0.42663 |
| <i>CAPN1</i>    | <i>EIF6</i>     | 0.29775 | 0.73097 | 0.43322  |
| <i>CARD17</i>   | <i>CARD18</i>   | 0.81464 | 0.31096 | -0.50368 |
| <i>CAV1</i>     | <i>SDPR</i>     | 0.63497 | 0.20806 | -0.42691 |
| <i>CCDC185</i>  | <i>KRTAP4-1</i> | 0.78799 | 0.35687 | -0.43112 |
| <i>CCT3</i>     | <i>TRIM28</i>   | 0.17422 | 0.73042 | 0.5562   |
| <i>CD2</i>      | <i>LCK</i>      | 0.78875 | 0.3226  | -0.46615 |
| <i>CD3E</i>     | <i>CD3G</i>     | 0.66462 | 0.24861 | -0.41601 |
| <i>CD63</i>     | <i>VKORC1</i>   | 0.28251 | 0.72004 | 0.43753  |
| <i>CD74</i>     | <i>HLA-DRB1</i> | 0.17443 | 0.6255  | 0.45107  |
| <i>CD81</i>     | <i>RPL11</i>    | 0.24525 | 0.65262 | 0.40737  |
| <i>CD81</i>     | <i>RPL27</i>    | 0.21217 | 0.66267 | 0.4505   |
| <i>CD81</i>     | <i>RPS4Y1</i>   | 0.24417 | 0.65177 | 0.4076   |
| <i>CD81</i>     | <i>VKORC1</i>   | 0.25933 | 0.73582 | 0.47649  |
| <i>CDC5L</i>    | <i>WRN</i>      | 0.24803 | 0.70293 | 0.4549   |
| <i>CDH7</i>     | <i>FGF21</i>    | 0.93478 | 0.36169 | -0.57309 |
| <i>CDIPT</i>    | <i>ILK</i>      | 0.2376  | 0.64687 | 0.40927  |
| <i>CGA</i>      | <i>CGB</i>      | 1       | 0.34864 | -0.65136 |
| <i>CGA</i>      | <i>FSHR</i>     | 0.76816 | 0.24981 | -0.51835 |
| <i>CGA</i>      | <i>TSHB</i>     | 0.827   | 0.22916 | -0.59784 |
| <i>CHMP3</i>    | <i>UBE2H</i>    | 0.71173 | 0.30583 | -0.4059  |
| <i>CHMP4A</i>   | <i>VPS4A</i>    | 0.1973  | 0.59782 | 0.40052  |
| <i>CLIC1</i>    | <i>RPLP1</i>    | 0.28034 | 0.76256 | 0.48222  |

|         |          |         |         |          |
|---------|----------|---------|---------|----------|
| CLPS    | LIPF     | 0.93478 | 0.33108 | -0.6037  |
| CLPS    | PNLIP    | 1       | 0.55914 | -0.44086 |
| CLPS    | PNLIPRP2 | 0.97005 | 0.42691 | -0.54314 |
| COPB2   | LMAN1    | 0.79941 | 0.36443 | -0.43498 |
| COPS6   | TAF15    | 0.25871 | 0.69474 | 0.43603  |
| CPN1    | CPN2     | 0.70745 | 0.27905 | -0.4284  |
| CREB1   | DR1      | 0.90375 | 0.44986 | -0.45389 |
| CREB1   | ETS1     | 0.62616 | 0.22082 | -0.40534 |
| CREB3   | FIS1     | 0.25532 | 0.69855 | 0.44323  |
| CREB3   | RABAC1   | 0.26777 | 0.68781 | 0.42004  |
| CREB3   | VKORC1   | 0.28365 | 0.70598 | 0.42233  |
| CRK     | DDX6     | 0.74533 | 0.32194 | -0.42339 |
| CRK     | IRS1     | 0.65234 | 0.23256 | -0.41978 |
| CRP     | HIST1H1A | 0.72274 | 0.3074  | -0.41534 |
| CRYAA   | CRYBA1   | 0.72308 | 0.31935 | -0.40373 |
| CRYAA   | CRYGC    | 0.97826 | 0.49517 | -0.48309 |
| CRYAA   | CRYGD    | 0.88114 | 0.36344 | -0.5177  |
| CRYAA   | LALBA    | 0.94723 | 0.38997 | -0.55726 |
| CRYGC   | CRYGD    | 1       | 0.41279 | -0.58721 |
| CSH1    | PCBP1    | 0.25263 | 0.69009 | 0.43746  |
| CSH1    | PFDN5    | 0.19568 | 0.63399 | 0.43831  |
| CSN1S1  | KLK6     | 0.79385 | 0.26718 | -0.52667 |
| CSN2    | CSN3     | 1       | 0.50003 | -0.49997 |
| CSNK1A1 | SYNCRIP  | 0.77511 | 0.33148 | -0.44363 |
| CSNK2B  | PRMT1    | 0.29467 | 0.73827 | 0.4436   |
| CSNK2B  | RPS8     | 0.2582  | 0.75469 | 0.49649  |
| CSNK2B  | SSRP1    | 0.25109 | 0.65665 | 0.40556  |
| CSR3    | LIMS3    | 0.8994  | 0.29988 | -0.59952 |
| CSR3    | MYF6     | 0.92756 | 0.30091 | -0.62665 |
| CSR3    | MYOG     | 0.97791 | 0.29312 | -0.68479 |
| CSTF2T  | UBQLN1   | 0.67741 | 0.24034 | -0.43707 |
| CTCFL   | HIST1H3B | 0.82443 | 0.30786 | -0.51657 |
| CTCFL   | HIST1H3C | 0.79626 | 0.29743 | -0.49883 |
| CTCFL   | HIST1H3F | 0.873   | 0.34061 | -0.53239 |
| CTCFL   | HIST1H3J | 0.75062 | 0.29356 | -0.45706 |
| CTNNA1  | DLG1     | 0.88114 | 0.38593 | -0.49521 |
| CTNNA1  | TJP1     | 0.81418 | 0.33712 | -0.47706 |
| CTNNA1  | VCL      | 0.66939 | 0.25053 | -0.41886 |
| CUL3    | KRR1     | 0.8582  | 0.4555  | -0.4027  |
| CUL3    | PHAX     | 0.74383 | 0.33044 | -0.41339 |
| CUL3    | PRKAR1A  | 0.7972  | 0.37489 | -0.42231 |
| CYC1    | NDUFB10  | 0.25327 | 0.76991 | 0.51664  |
| CYHR1   | VPS26A   | 0.81137 | 0.27151 | -0.53986 |
| CYP11B1 | CYP11B2  | 0.86667 | 0.44703 | -0.41964 |
| DAG1    | UTRN     | 0.76295 | 0.20797 | -0.55498 |
| DAZ2    | DAZL     | 0.84639 | 0.35052 | -0.49587 |
| DDX6    | PNRC2    | 0.81942 | 0.34141 | -0.47801 |
| DEFA5   | PRSS1    | 1       | 0.338   | -0.662   |
| DEK     | EP300    | 0.68832 | 0.24041 | -0.44791 |
| DISC1   | EXOC4    | 0.82033 | 0.35407 | -0.46626 |
| DISC1   | SMC3     | 0.83401 | 0.38558 | -0.44843 |
| DISC1   | XRN2     | 0.73708 | 0.31866 | -0.41842 |
| DMBX1   | OTX2     | 0.71342 | 0.29157 | -0.42185 |
| DNAJB9  | RFK      | 0.76855 | 0.28984 | -0.47871 |
| DNMT3L  | HIST1H3B | 0.9027  | 0.34927 | -0.55343 |
| DNMT3L  | HIST1H3C | 0.86813 | 0.26312 | -0.60501 |

|                 |                  |         |         |          |
|-----------------|------------------|---------|---------|----------|
| <i>DNMT3L</i>   | <i>HIST1H3F</i>  | 0.94001 | 0.33261 | -0.6074  |
| <i>DNMT3L</i>   | <i>HIST1H3J</i>  | 0.82436 | 0.31501 | -0.50935 |
| <i>DNMT3L</i>   | <i>HIST1H4A</i>  | 0.84669 | 0.28707 | -0.55962 |
| <i>DNMT3L</i>   | <i>HIST1H4B</i>  | 0.78765 | 0.24712 | -0.54053 |
| <i>DNMT3L</i>   | <i>HIST1H4D</i>  | 0.88418 | 0.27398 | -0.6102  |
| <i>DNMT3L</i>   | <i>HIST1H4F</i>  | 0.92911 | 0.25352 | -0.67559 |
| <i>DNMT3L</i>   | <i>HIST1H4J</i>  | 1       | 0.25662 | -0.74338 |
| <i>DNMT3L</i>   | <i>HIST1H4K</i>  | 0.80505 | 0.34621 | -0.45884 |
| <i>DNMT3L</i>   | <i>HIST1H4L</i>  | 0.97826 | 0.39956 | -0.5787  |
| <i>DYNC1L12</i> | <i>DYNLT3</i>    | 0.69085 | 0.23784 | -0.45301 |
| <i>DYNLL1</i>   | <i>GNB2L1</i>    | 0.26465 | 0.74787 | 0.48322  |
| <i>EEF2</i>     | <i>RPS24</i>     | 0.25869 | 0.68654 | 0.42785  |
| <i>EEF2</i>     | <i>RPS4X</i>     | 0.20359 | 0.76721 | 0.56362  |
| <i>EEF2</i>     | <i>RPS6</i>      | 0.33832 | 0.81455 | 0.47623  |
| <i>EIF3D</i>    | <i>RPS4X</i>     | 0.26852 | 0.73703 | 0.46851  |
| <i>EIF3I</i>    | <i>EIF3K</i>     | 0.27875 | 0.69283 | 0.41408  |
| <i>EIF3I</i>    | <i>VIM</i>       | 0.21408 | 0.64994 | 0.43586  |
| <i>EIF3K</i>    | <i>GNB2L1</i>    | 0.23245 | 0.70148 | 0.46903  |
| <i>ELSPBP1</i>  | <i>MYF6</i>      | 0.87629 | 0.40134 | -0.47495 |
| <i>ELSPBP1</i>  | <i>MYOG</i>      | 0.91307 | 0.39882 | -0.51425 |
| <i>EP300</i>    | <i>H3F3B</i>     | 0.70637 | 0.29174 | -0.41463 |
| <i>EP300</i>    | <i>NBN</i>       | 0.77082 | 0.31915 | -0.45167 |
| <i>EP300</i>    | <i>PPP2R5C</i>   | 0.70752 | 0.28721 | -0.42031 |
| <i>ERBB2IP</i>  | <i>SHOC2</i>     | 0.71828 | 0.31684 | -0.40144 |
| <i>ESRRA</i>    | <i>PNRC2</i>     | 0.77386 | 0.34252 | -0.43134 |
| <i>EWSR1</i>    | <i>PCBP1</i>     | 0.18683 | 0.65075 | 0.46392  |
| <i>FBL</i>      | <i>RPS24</i>     | 0.2721  | 0.75204 | 0.47994  |
| <i>FBL</i>      | <i>RPS4X</i>     | 0.28913 | 0.7088  | 0.41967  |
| <i>FBXW11</i>   | <i>YAP1</i>      | 0.7976  | 0.37137 | -0.42623 |
| <i>G3BP2</i>    | <i>RIOK2</i>     | 0.85174 | 0.38936 | -0.46238 |
| <i>G3BP2</i>    | <i>RNH1</i>      | 0.72284 | 0.32026 | -0.40258 |
| <i>G3BP2</i>    | <i>TLN1</i>      | 0.62776 | 0.2052  | -0.42256 |
| <i>GAGE1</i>    | <i>TERF2IP</i>   | 0.32252 | 0.74755 | 0.42503  |
| <i>GH1</i>      | <i>HIST1H2BI</i> | 0.82924 | 0.23253 | -0.59671 |
| <i>GIGYF2</i>   | <i>PRPF8</i>     | 0.72019 | 0.31463 | -0.40556 |
| <i>GNB2L1</i>   | <i>RPL7A</i>     | 0.21064 | 0.62035 | 0.40971  |
| <i>GNB2L1</i>   | <i>RPS8</i>      | 0.25317 | 0.6638  | 0.41063  |
| <i>GNGT1</i>    | <i>RHO</i>       | 0.78497 | 0.30273 | -0.48224 |
| <i>GPHA2</i>    | <i>GPHB5</i>     | 0.917   | 0.21123 | -0.70577 |
| <i>GSTK1</i>    | <i>PCBP1</i>     | 0.19304 | 0.59584 | 0.4028   |
| <i>GSTK1</i>    | <i>UNC45A</i>    | 0.22029 | 0.64753 | 0.42724  |
| <i>GULP1</i>    | <i>ITGB1</i>     | 0.76957 | 0.2465  | -0.52307 |
| <i>HERPUD1</i>  | <i>SYVN1</i>     | 0.21874 | 0.61894 | 0.4002   |
| <i>HGS</i>      | <i>UBQLN1</i>    | 0.76283 | 0.35352 | -0.40931 |
| <i>HIST1H1A</i> | <i>HIST1H3A</i>  | 0.83164 | 0.34426 | -0.48738 |
| <i>HIST1H1A</i> | <i>HIST1H3B</i>  | 0.94689 | 0.36348 | -0.58341 |
| <i>HIST1H1A</i> | <i>HIST1H3C</i>  | 0.94723 | 0.32829 | -0.61894 |
| <i>HIST1H1A</i> | <i>HIST1H3F</i>  | 0.97791 | 0.31731 | -0.6606  |
| <i>HIST1H1A</i> | <i>HIST1H3G</i>  | 0.86956 | 0.31764 | -0.55192 |
| <i>HIST1H1A</i> | <i>HIST1H3I</i>  | 0.84874 | 0.24562 | -0.60312 |
| <i>HIST1H1A</i> | <i>HIST1H3J</i>  | 0.917   | 0.32206 | -0.59494 |
| <i>HIST1H2A</i> | <i>HIST1H2B</i>  | 1       | 0.42889 | -0.57111 |
| <i>HIST1H2A</i> | <i>HIST1H2B</i>  | 1       | 0.41969 | -0.58031 |
| <i>HIST1H2A</i> | <i>HIST1H3A</i>  | 0.74505 | 0.23878 | -0.50627 |
| <i>HIST1H2A</i> | <i>HIST1H3B</i>  | 0.96438 | 0.2626  | -0.70178 |
| <i>HIST1H2A</i> | <i>HIST1H3C</i>  | 0.93478 | 0.27182 | -0.66296 |

|          |          |         |         |          |
|----------|----------|---------|---------|----------|
| HIST1H2A | HIST1H3F | 0.99965 | 0.29049 | -0.70916 |
| HIST1H2A | HIST1H3G | 0.78243 | 0.22825 | -0.55418 |
| HIST1H2A | HIST1H3I | 0.84355 | 0.23266 | -0.61089 |
| HIST1H2A | HIST1H3J | 0.88587 | 0.22908 | -0.65679 |
| HIST1H2A | HIST1H3G | 0.59607 | 0.18515 | -0.41092 |
| HIST1H2B | HIST1H3A | 0.94011 | 0.29636 | -0.64375 |
| HIST1H2B | HIST1H3B | 1       | 0.33775 | -0.66225 |
| HIST1H2B | HIST1H3C | 1       | 0.3457  | -0.6543  |
| HIST1H2B | HIST1H3F | 1       | 0.41161 | -0.58839 |
| HIST1H2B | HIST1H3G | 0.9576  | 0.35615 | -0.60145 |
| HIST1H2B | HIST1H3I | 1       | 0.32171 | -0.67829 |
| HIST1H2B | HIST1H3J | 0.97005 | 0.37747 | -0.59258 |
| HIST1H3A | HIST1H4A | 0.78726 | 0.23576 | -0.5515  |
| HIST1H3A | HIST1H4B | 0.73378 | 0.27913 | -0.45465 |
| HIST1H3A | HIST1H4D | 0.9042  | 0.28028 | -0.62392 |
| HIST1H3A | HIST1H4F | 0.83506 | 0.24876 | -0.5863  |
| HIST1H3A | HIST1H4J | 0.88842 | 0.27741 | -0.61101 |
| HIST1H3A | HIST1H4K | 0.77114 | 0.24493 | -0.52621 |
| HIST1H3A | HIST1H4L | 0.88114 | 0.31778 | -0.56336 |
| HIST1H3A | LALBA    | 0.88114 | 0.30882 | -0.57232 |
| HIST1H3B | HIST1H4A | 0.99965 | 0.28498 | -0.71467 |
| HIST1H3B | HIST1H4B | 0.96971 | 0.20983 | -0.75988 |
| HIST1H3B | HIST1H4C | 0.64173 | 0.22936 | -0.41237 |
| HIST1H3B | HIST1H4D | 0.94689 | 0.2661  | -0.68079 |
| HIST1H3B | HIST1H4F | 0.99965 | 0.25641 | -0.74324 |
| HIST1H3B | HIST1H4I | 0.71705 | 0.26291 | -0.45414 |
| HIST1H3B | HIST1H4J | 1       | 0.28504 | -0.71496 |
| HIST1H3B | HIST1H4K | 0.95726 | 0.32205 | -0.63521 |
| HIST1H3B | HIST1H4L | 1       | 0.39688 | -0.60312 |
| HIST1H3B | LALBA    | 1       | 0.32839 | -0.67161 |
| HIST1H3C | HIST1H4A | 0.93478 | 0.22476 | -0.71002 |
| HIST1H3C | HIST1H4B | 0.90483 | 0.24286 | -0.66197 |
| HIST1H3C | HIST1H4C | 0.63135 | 0.20362 | -0.42773 |
| HIST1H3C | HIST1H4D | 1       | 0.23978 | -0.76022 |
| HIST1H3C | HIST1H4E | 0.61072 | 0.19404 | -0.41668 |
| HIST1H3C | HIST1H4F | 0.97005 | 0.27854 | -0.69151 |
| HIST1H3C | HIST1H4I | 0.71859 | 0.23073 | -0.48786 |
| HIST1H3C | HIST1H4J | 0.97826 | 0.27904 | -0.69922 |
| HIST1H3C | HIST1H4K | 0.91728 | 0.22624 | -0.69104 |
| HIST1H3C | HIST1H4L | 0.97826 | 0.31907 | -0.65919 |
| HIST1H3C | LALBA    | 0.97826 | 0.36001 | -0.61825 |
| HIST1H3F | HIST1H4A | 0.96971 | 0.25442 | -0.71529 |
| HIST1H3F | HIST1H4B | 0.96971 | 0.22676 | -0.74295 |
| HIST1H3F | HIST1H4D | 0.96971 | 0.23495 | -0.73476 |
| HIST1H3F | HIST1H4F | 0.97791 | 0.29723 | -0.68068 |
| HIST1H3F | HIST1H4I | 0.84685 | 0.31009 | -0.53676 |
| HIST1H3F | HIST1H4J | 0.97826 | 0.28537 | -0.69289 |
| HIST1H3F | HIST1H4K | 0.99965 | 0.19773 | -0.80192 |
| HIST1H3F | HIST1H4L | 0.97826 | 0.28916 | -0.6891  |
| HIST1H3F | LALBA    | 0.97826 | 0.3007  | -0.67756 |
| HIST1H3G | HIST1H4A | 0.86956 | 0.32649 | -0.54307 |
| HIST1H3G | HIST1H4B | 0.86956 | 0.21632 | -0.65324 |
| HIST1H3G | HIST1H4D | 0.92945 | 0.26935 | -0.6601  |
| HIST1H3G | HIST1H4F | 0.96971 | 0.24867 | -0.72104 |
| HIST1H3G | HIST1H4J | 0.93432 | 0.21044 | -0.72388 |
| HIST1H3G | HIST1H4K | 0.90027 | 0.23261 | -0.66766 |

|                 |                 |         |         |          |
|-----------------|-----------------|---------|---------|----------|
| <i>HIST1H3G</i> | <i>HIST1H4L</i> | 0.93432 | 0.41417 | -0.52015 |
| <i>HIST1H3G</i> | <i>LALBA</i>    | 0.93432 | 0.25527 | -0.67905 |
| <i>HIST1H3I</i> | <i>HIST1H4A</i> | 0.85217 | 0.20602 | -0.64615 |
| <i>HIST1H3I</i> | <i>HIST1H4B</i> | 0.76967 | 0.21938 | -0.55029 |
| <i>HIST1H3I</i> | <i>HIST1H4D</i> | 0.87468 | 0.25776 | -0.61692 |
| <i>HIST1H3I</i> | <i>HIST1H4F</i> | 0.92489 | 0.28923 | -0.63566 |
| <i>HIST1H3I</i> | <i>HIST1H4J</i> | 0.97826 | 0.36225 | -0.61601 |
| <i>HIST1H3I</i> | <i>HIST1H4K</i> | 0.79678 | 0.27365 | -0.52313 |
| <i>HIST1H3I</i> | <i>HIST1H4L</i> | 0.94745 | 0.28428 | -0.66317 |
| <i>HIST1H3I</i> | <i>LALBA</i>    | 0.97826 | 0.37456 | -0.6037  |
| <i>HIST1H3J</i> | <i>HIST1H4A</i> | 0.86816 | 0.21716 | -0.651   |
| <i>HIST1H3J</i> | <i>HIST1H4B</i> | 0.87577 | 0.21596 | -0.65981 |
| <i>HIST1H3J</i> | <i>HIST1H4D</i> | 0.85919 | 0.21242 | -0.64677 |
| <i>HIST1H3J</i> | <i>HIST1H4F</i> | 0.90153 | 0.27309 | -0.62844 |
| <i>HIST1H3J</i> | <i>HIST1H4J</i> | 0.94723 | 0.29221 | -0.65502 |
| <i>HIST1H3J</i> | <i>HIST1H4K</i> | 0.87891 | 0.30628 | -0.57263 |
| <i>HIST1H3J</i> | <i>HIST1H4L</i> | 1       | 0.26445 | -0.73555 |
| <i>HIST1H3J</i> | <i>LALBA</i>    | 0.94723 | 0.36431 | -0.58292 |
| <i>HIST1H4A</i> | <i>HIST3H3</i>  | 0.80168 | 0.26805 | -0.53363 |
| <i>HIST1H4A</i> | <i>PRAME</i>    | 0.70274 | 0.28542 | -0.41732 |
| <i>HIST1H4B</i> | <i>HIST3H3</i>  | 0.75148 | 0.28131 | -0.47017 |
| <i>HIST1H4B</i> | <i>PRAME</i>    | 0.67151 | 0.19502 | -0.47649 |
| <i>HIST1H4D</i> | <i>HIST3H3</i>  | 0.81479 | 0.23095 | -0.58384 |
| <i>HIST1H4D</i> | <i>PRAME</i>    | 0.68631 | 0.26073 | -0.42558 |
| <i>HIST1H4F</i> | <i>HIST3H3</i>  | 0.90053 | 0.21579 | -0.68474 |
| <i>HIST1H4F</i> | <i>PRAME</i>    | 0.7093  | 0.23403 | -0.47527 |
| <i>HIST1H4J</i> | <i>HIST3H3</i>  | 0.91016 | 0.26531 | -0.64485 |
| <i>HIST1H4J</i> | <i>PRAME</i>    | 0.76808 | 0.238   | -0.53008 |
| <i>HIST1H4K</i> | <i>HIST3H3</i>  | 0.85048 | 0.26397 | -0.58651 |
| <i>HIST1H4K</i> | <i>PRAME</i>    | 0.68276 | 0.2094  | -0.47336 |
| <i>HIST1H4L</i> | <i>HIST3H3</i>  | 0.90438 | 0.37233 | -0.53205 |
| <i>HIST1H4L</i> | <i>PRAME</i>    | 0.75423 | 0.33898 | -0.41525 |
| <i>HNRNPH2</i>  | <i>RIOK2</i>    | 0.78124 | 0.38089 | -0.40035 |
| <i>HNRNPR</i>   | <i>SYNCRIP</i>  | 0.7495  | 0.28403 | -0.46547 |
| <i>HNRNPU</i>   | <i>LBR</i>      | 0.69477 | 0.2811  | -0.41367 |
| <i>HNRNPU</i>   | <i>LSM14A</i>   | 0.76186 | 0.32063 | -0.44123 |
| <i>HNRNPU</i>   | <i>MRGBP</i>    | 0.69415 | 0.27219 | -0.42196 |
| <i>HSF1</i>     | <i>SMARCA4</i>  | 0.20894 | 0.62689 | 0.41795  |
| <i>HTRA2</i>    | <i>VPS4B</i>    | 0.768   | 0.33436 | -0.43364 |
| <i>HUWE1</i>    | <i>PRKAR1A</i>  | 0.78899 | 0.34895 | -0.44004 |
| <i>HUWE1</i>    | <i>PRPF8</i>    | 0.88022 | 0.47927 | -0.40095 |
| <i>HUWE1</i>    | <i>SNRNP200</i> | 0.88593 | 0.30974 | -0.57619 |
| <i>IAPP</i>     | <i>PDX1</i>     | 0.88706 | 0.38974 | -0.49732 |
| <i>IFITM3</i>   | <i>VKORC1</i>   | 0.26749 | 0.72722 | 0.45973  |
| <i>ILK</i>      | <i>VKORC1</i>   | 0.1906  | 0.71281 | 0.52221  |
| <i>ISL1</i>     | <i>LHX3</i>     | 0.66405 | 0.25558 | -0.40847 |
| <i>ITCH</i>     | <i>NUMB</i>     | 0.68754 | 0.24604 | -0.4415  |
| <i>ITCH</i>     | <i>TAX1BP1</i>  | 0.67183 | 0.25451 | -0.41732 |
| <i>ITGAV</i>    | <i>ITGB1</i>    | 0.74216 | 0.25319 | -0.48897 |
| <i>ITGB1</i>    | <i>RAB8B</i>    | 0.75659 | 0.30329 | -0.4533  |
| <i>ITGB1</i>    | <i>TGOLN2</i>   | 0.72113 | 0.31904 | -0.40209 |
| <i>ITGB1</i>    | <i>TLN1</i>     | 0.74561 | 0.24646 | -0.49915 |
| <i>KIAA1033</i> | <i>ROCK1</i>    | 0.82125 | 0.42003 | -0.40122 |
| <i>KIAA1429</i> | <i>SNRNP200</i> | 0.7795  | 0.36896 | -0.41054 |
| <i>KIR3DS1</i>  | <i>NDUFAF3</i>  | 0.29566 | 0.70159 | 0.40593  |
| <i>KMT2A</i>    | <i>TAF6</i>     | 0.17787 | 0.58393 | 0.40606  |

|                 |                 |         |         |          |
|-----------------|-----------------|---------|---------|----------|
| <i>KRTAP3-2</i> | <i>KRTAP4-1</i> | 0.81914 | 0.32017 | -0.49897 |
| <i>KRTAP4-1</i> | <i>SMCP</i>     | 0.88509 | 0.31977 | -0.56532 |
| <i>KRTAP4-1</i> | <i>TCEB3B</i>   | 0.7301  | 0.31362 | -0.41648 |
| <i>LEPR</i>     | <i>SNX4</i>     | 0.74112 | 0.33239 | -0.40873 |
| <i>LGALS1</i>   | <i>LGALS3BP</i> | 0.17383 | 0.6419  | 0.46807  |
| <i>LHX3</i>     | <i>POU4F3</i>   | 0.76006 | 0.26596 | -0.4941  |
| <i>LMAN1</i>    | <i>TMED5</i>    | 0.81995 | 0.35054 | -0.46941 |
| <i>LZTS2</i>    | <i>RBPMS</i>    | 0.21342 | 0.6541  | 0.44068  |
| <i>MAGEA11</i>  | <i>TEX37</i>    | 0.97791 | 0.47748 | -0.50043 |
| <i>MAGEA11</i>  | <i>ZSWIM2</i>   | 0.7904  | 0.38528 | -0.40512 |
| <i>MAP4</i>     | <i>TLN1</i>     | 0.76346 | 0.25933 | -0.50413 |
| <i>MAPK1</i>    | <i>NCOA3</i>    | 0.7625  | 0.34679 | -0.41571 |
| <i>MAPK1</i>    | <i>PPM1A</i>    | 0.81939 | 0.36101 | -0.45838 |
| <i>MC4R</i>     | <i>NPY</i>      | 0.77433 | 0.23909 | -0.53524 |
| <i>MEP1B</i>    | <i>NPY</i>      | 0.73828 | 0.24748 | -0.4908  |
| <i>MLF2</i>     | <i>TXNDC12</i>  | 0.23538 | 0.69758 | 0.4622   |
| <i>MLN</i>      | <i>MLNR</i>     | 0.76692 | 0.28259 | -0.48433 |
| <i>MMGT1</i>    | <i>TM9SF2</i>   | 0.72091 | 0.29347 | -0.42744 |
| <i>MMP8</i>     | <i>UMOD</i>     | 0.7965  | 0.33225 | -0.46425 |
| <i>MRPL32</i>   | <i>MRPL37</i>   | 0.1987  | 0.65765 | 0.45895  |
| <i>MSN</i>      | <i>PAFAH1B2</i> | 0.71505 | 0.26601 | -0.44904 |
| <i>MSN</i>      | <i>PPM1A</i>    | 0.69343 | 0.2833  | -0.41013 |
| <i>MTNR1A</i>   | <i>MTNR1B</i>   | 0.87315 | 0.36284 | -0.51031 |
| <i>MUC7</i>     | <i>SMR3B</i>    | 0.93478 | 0.39793 | -0.53685 |
| <i>MYH6</i>     | <i>MYL7</i>     | 0.88953 | 0.36547 | -0.52406 |
| <i>MYOG</i>     | <i>TRIM43</i>   | 1       | 0.50251 | -0.49749 |
| <i>NBN</i>      | <i>XRCC5</i>    | 0.7362  | 0.31767 | -0.41853 |
| <i>NDUFS1</i>   | <i>STX12</i>    | 0.71596 | 0.31457 | -0.40139 |
| <i>NME1</i>     | <i>PCBP1</i>    | 0.22114 | 0.747   | 0.52586  |
| <i>NPY</i>      | <i>NPY2R</i>    | 0.74316 | 0.28204 | -0.46112 |
| <i>OAZ1</i>     | <i>PSMB4</i>    | 0.22335 | 0.65784 | 0.43449  |
| <i>OBP2A</i>    | <i>OR1G1</i>    | 0.86865 | 0.37482 | -0.49383 |
| <i>OS9</i>      | <i>PIIB</i>     | 0.25312 | 0.66895 | 0.41583  |
| <i>OS9</i>      | <i>RPN1</i>     | 0.25553 | 0.66174 | 0.40621  |
| <i>OST4</i>     | <i>RPN1</i>     | 0.21179 | 0.66715 | 0.45536  |
| <i>OTUB1</i>    | <i>UBE2V1</i>   | 0.21946 | 0.73044 | 0.51098  |
| <i>P4HB</i>     | <i>PRKCSH</i>   | 0.28959 | 0.71031 | 0.42072  |
| <i>PAFAH1B2</i> | <i>YWHAG</i>    | 0.67017 | 0.2513  | -0.41887 |
| <i>PCBP1</i>    | <i>PCBP2</i>    | 0.22509 | 0.64513 | 0.42004  |
| <i>PCBP1</i>    | <i>RBM42</i>    | 0.18626 | 0.61686 | 0.4306   |
| <i>PDX1</i>     | <i>SLC2A2</i>   | 0.84347 | 0.35842 | -0.48505 |
| <i>PJA2</i>     | <i>PRKAR1A</i>  | 0.85027 | 0.43881 | -0.41146 |
| <i>PLEKHF2</i>  | <i>SDPR</i>     | 0.7003  | 0.22673 | -0.47357 |
| <i>PNRC2</i>    | <i>SPAG9</i>    | 0.62588 | 0.20404 | -0.42184 |
| <i>PIIB</i>     | <i>VKORC1</i>   | 0.30742 | 0.76003 | 0.45261  |
| <i>PPM1G</i>    | <i>SNRNP70</i>  | 0.22137 | 0.71546 | 0.49409  |
| <i>PPM1G</i>    | <i>STAT6</i>    | 0.23849 | 0.64306 | 0.40457  |
| <i>PPP1CC</i>   | <i>RPRD2</i>    | 0.79694 | 0.30461 | -0.49233 |
| <i>PPP2R1A</i>  | <i>STRN</i>     | 0.3183  | 0.72444 | 0.40614  |
| <i>PPP3CA</i>   | <i>UTRN</i>     | 0.72385 | 0.29392 | -0.42993 |
| <i>PRKACG</i>   | <i>TNP1</i>     | 0.83143 | 0.2325  | -0.59893 |
| <i>PRKAR1A</i>  | <i>PRPF40A</i>  | 0.72314 | 0.29871 | -0.42443 |
| <i>PRKAR1A</i>  | <i>SETD7</i>    | 0.68483 | 0.28199 | -0.40284 |
| <i>PRPF6</i>    | <i>RPS24</i>    | 0.21318 | 0.61792 | 0.40474  |
| <i>PSMB1</i>    | <i>PSMB5</i>    | 0.22114 | 0.64996 | 0.42882  |
| <i>PSMB1</i>    | <i>PSMB6</i>    | 0.24012 | 0.64415 | 0.40403  |

|                |                |         |         |          |
|----------------|----------------|---------|---------|----------|
| <i>PSMB1</i>   | <i>PSMC5</i>   | 0.24134 | 0.66889 | 0.42755  |
| <i>PSMB4</i>   | <i>PSMD3</i>   | 0.2477  | 0.69506 | 0.44736  |
| <i>PSMB5</i>   | <i>PSMC5</i>   | 0.32978 | 0.74739 | 0.41761  |
| <i>PSMB6</i>   | <i>PSMD3</i>   | 0.21642 | 0.64685 | 0.43043  |
| <i>PSMB6</i>   | <i>PSME1</i>   | 0.20678 | 0.62467 | 0.41789  |
| <i>PSMC5</i>   | <i>PSMD3</i>   | 0.19115 | 0.61993 | 0.42878  |
| <i>PSMC5</i>   | <i>VIM</i>     | 0.17893 | 0.60623 | 0.4273   |
| <i>RAD21</i>   | <i>SMC3</i>    | 0.84078 | 0.3297  | -0.51108 |
| <i>RAD23B</i>  | <i>UBQLN1</i>  | 0.72011 | 0.28968 | -0.43043 |
| <i>RAD50</i>   | <i>RFC1</i>    | 0.82871 | 0.41114 | -0.41757 |
| <i>RB1</i>     | <i>SETD7</i>   | 0.88114 | 0.4286  | -0.45254 |
| <i>RBM10</i>   | <i>SF1</i>     | 0.30277 | 0.74388 | 0.44111  |
| <i>RDX</i>     | <i>ROCK2</i>   | 0.69209 | 0.25925 | -0.43284 |
| <i>REG1A</i>   | <i>REG3A</i>   | 0.88309 | 0.27062 | -0.61247 |
| <i>RIOK2</i>   | <i>VPS26A</i>  | 0.7794  | 0.35586 | -0.42354 |
| <i>RNF113B</i> | <i>UBE2U</i>   | 0.71542 | 0.30951 | -0.40591 |
| <i>RPL10</i>   | <i>RPL4</i>    | 0.78381 | 0.33792 | -0.44589 |
| <i>RPL10</i>   | <i>RPL6</i>    | 0.77421 | 0.35166 | -0.42255 |
| <i>RPL11</i>   | <i>RPL30</i>   | 0.21118 | 0.61291 | 0.40173  |
| <i>RPL11</i>   | <i>RPL8</i>    | 0.16766 | 0.71283 | 0.54517  |
| <i>RPL11</i>   | <i>RPLP1</i>   | 0.20205 | 0.63353 | 0.43148  |
| <i>RPL11</i>   | <i>RPS24</i>   | 0.20798 | 0.65485 | 0.44687  |
| <i>RPL11</i>   | <i>RPS4X</i>   | 0.24401 | 0.72699 | 0.48298  |
| <i>RPL11</i>   | <i>UBB</i>     | 0.2044  | 0.72129 | 0.51689  |
| <i>RPL12</i>   | <i>RPS3A</i>   | 0.82948 | 0.37554 | -0.45394 |
| <i>RPL18A</i>  | <i>RPS27A</i>  | 0.67896 | 0.26756 | -0.4114  |
| <i>RPL30</i>   | <i>RPL31</i>   | 0.26573 | 0.87755 | 0.61182  |
| <i>RPL30</i>   | <i>RPS3</i>    | 0.28619 | 0.7006  | 0.41441  |
| <i>RPL31</i>   | <i>RPL37A</i>  | 0.25986 | 0.76238 | 0.50252  |
| <i>RPL6</i>    | <i>RPLP0</i>   | 0.88229 | 0.40345 | -0.47884 |
| <i>RPL6</i>    | <i>RPS27A</i>  | 0.89679 | 0.47124 | -0.42555 |
| <i>RPL7A</i>   | <i>RPS2</i>    | 0.7622  | 0.36161 | -0.40059 |
| <i>RPL7A</i>   | <i>RPS3A</i>   | 0.79389 | 0.39263 | -0.40126 |
| <i>RPL8</i>    | <i>RPS4X</i>   | 0.35415 | 0.75747 | 0.40332  |
| <i>RPLP2</i>   | <i>RPS24</i>   | 0.27739 | 0.70679 | 0.4294   |
| <i>RPS20</i>   | <i>RPS4X</i>   | 0.24504 | 0.66089 | 0.41585  |
| <i>RPS24</i>   | <i>RPS4X</i>   | 0.3465  | 0.76791 | 0.42141  |
| <i>RPS24</i>   | <i>RPS8</i>    | 0.44255 | 0.85303 | 0.41048  |
| <i>RPS4X</i>   | <i>RPS6</i>    | 0.16017 | 0.61573 | 0.45556  |
| <i>RPS4X</i>   | <i>RPS8</i>    | 0.34657 | 0.75092 | 0.40435  |
| <i>RPS4X</i>   | <i>SNU13</i>   | 0.23658 | 0.65323 | 0.41665  |
| <i>S100A16</i> | <i>S100A7A</i> | 0.19815 | 0.59836 | 0.40021  |
| <i>SF1</i>     | <i>TAF15</i>   | 0.21941 | 0.62795 | 0.40854  |
| <i>SF3B6</i>   | <i>SNRPD2</i>  | 0.17942 | 0.59739 | 0.41797  |
| <i>SNRPB</i>   | <i>SNRPD2</i>  | 0.25164 | 0.67163 | 0.41999  |
| <i>SNU13</i>   | <i>SURF4</i>   | 0.20898 | 0.62302 | 0.41404  |
| <i>SP3</i>     | <i>TGFBR2</i>  | 0.7484  | 0.3057  | -0.4427  |
| <i>STAG2</i>   | <i>WAPL</i>    | 0.86465 | 0.42168 | -0.44297 |
| <i>TBC1D5</i>  | <i>VPS26A</i>  | 0.80298 | 0.34136 | -0.46162 |
| <i>TRIM43</i>  | <i>TRIM8</i>   | 0.20044 | 0.68126 | 0.48082  |
| <i>UBE2U</i>   | <i>ZSWIM2</i>  | 0.82545 | 0.37885 | -0.4466  |
| <i>VPS26A</i>  | <i>VPS4B</i>   | 0.85007 | 0.38545 | -0.46462 |
| <i>YWHAG</i>   | <i>YWHAQ</i>   | 0.7589  | 0.33125 | -0.42765 |

NOR, normal; COPD, chronic obstructive pulmonary disease.
